# Supplementary material for: Syntheses and structure of dinuclear metal complexes containing naphthyl-Ir bichromophore
Source: Royal Society of Chemistry journal article supplement (doi:10.1039/d1dt01853a), 2021-01-01
Supplement: d1dt01853a1.pdf [file d1dt01853a1.pdf]

## Electronic Supporting Information

# Syntheses and Structure of Dinuclear Metal Complexes Containing Naphthyl-Ir Bichromophore

Ryo Ohyama<sup>†</sup>, Masaki Mishima<sup>‡</sup>, Akiko Inagaki<sup>\*†</sup>

<sup>†</sup>Department of Chemistry, Tokyo Metropolitan University, 1-1, Minami-Osawa, Hachioji, 192-0397 Tokyo, Japan.

<sup>‡</sup>Department of Molecular Biophysics, Tokyo University of Pharmacy and Life Sciences, School of Pharmacy, 1432-1 Horinouchi, Hachioji, Tokyo 192-0392, Japan.

| Contents                                                                                                                                                             | Figure        | Page |
|----------------------------------------------------------------------------------------------------------------------------------------------------------------------|---------------|------|
| General Procedures                                                                                                                                                   |               | S2   |
| Computational Details                                                                                                                                                |               | S2   |
| Preparation of 4-methyl-2-(3-(naphthalen-2-yl)phenyl)pyridine ( <b>L1</b> )                                                                                          | Figure S1     | S2   |
| Preparation of <b>1-Me</b> .                                                                                                                                         |               | S3   |
| X-ray Structural Determinations.                                                                                                                                     |               | S5   |
| ORTEP diagrams of <b>1-Me</b> .                                                                                                                                      | Figures S2-3  | S5   |
| IR spectra of <b>3-Me</b> (KBr / cm <sup>-1</sup> ).                                                                                                                 | Figure S4     | S6   |
| ORTEP diagram of <b>3-Me</b> (preliminary data).                                                                                                                     | Figure S5     | S7   |
| Crystal data and structure refinement for <b>1-Me</b> and <b>3-Me</b> .                                                                                              | Table S1      | S8   |
| Bond lengths [Å] and angles [°] for <b>1-Me</b> .                                                                                                                    | Table S2.     | S9   |
| Preparation of [Ir( <b>L1</b> ) <sub>2</sub> (bpm <sup>Br</sup> )PdMe(Me <sub>2</sub> CO)](BF <sub>4</sub> ) <sub>2</sub> ( <b>2-Me</b> ).                           | Figures S6-7  | S15  |
| Preparation of [Ir( <b>L1</b> ) <sub>2</sub> (bpm <sup>Br</sup> )Mn(CO) <sub>3</sub> Br](BF <sub>4</sub> ) ( <b>3-Me</b> )                                           | Figure S8     | S16  |
| Preparation of [Ir( <b>L1</b> ) <sub>2</sub> (bpm <sup>Br</sup> )Ir(PPh <sub>3</sub> ) <sub>2</sub> H <sub>2</sub> ](BF <sub>4</sub> ) <sub>2</sub> ( <b>4-Me</b> ). | Figures S9-11 | S17  |
| Details of photochemical catalytic reactions.                                                                                                                        |               | S19  |
| Emission spectra of <b>L1</b> and <b>1-H</b> .                                                                                                                       | Figure S12    | S20  |
| Absorption, emission, excitation spectra of <b>L1</b>                                                                                                                | Figure S13    | S20  |
| Excitation spectra of <b>1-Me</b>                                                                                                                                    | Figure S14    | S21  |
| Emission decay curve vs time of <b>1-Me</b> and <b>1-H</b> .                                                                                                         | Figure S15    | S21  |
| Optimized structure of <b>1-Me</b> cation.                                                                                                                           | Figure S16    | S22  |
| Optimized structure of <b>1-H</b> cation.                                                                                                                            | Figure S17    | S22  |
| Frontier and energetically nearby orbitals of <b>1-Me</b> .                                                                                                          | Figure S18    | S23  |
| Selected MO energy of <b>1-Me</b> and <b>1-H</b> .                                                                                                                   | Figure S19    | S24  |
| XYZ coordinate of optimized structure of <b>1-Me</b> .                                                                                                               | Table S3      | S25  |
| XYZ coordinate of optimized structure of <b>1-H</b> .                                                                                                                | Table S4.     | S27  |
| Residual monomer % in photocatalytic styrene polymerization by <b>2-Me</b> and <b>1-Me</b> .                                                                         | Figure S20.   | S30  |
| GPC traces of GPC traces of crude polymers catalyzed by <b>2-Me</b> .                                                                                                | Figure S21    | S31  |
| Selected <sup>13</sup> C NMR spectral data of polymers                                                                                                               | Figure S22    | S32  |

# Electronic Supporting Information

## Experimental Details and Spectral Data

### General Procedures.

Standard Schlenk and vacuum line techniques under a nitrogen atmosphere were employed for the reactions. Dichloromethane, acetone, THF, Et<sub>2</sub>O, dimethoxyethane, hexane, ethylacetate, DMF, acetonitrile, MeOH, EtOH, and chloroform were treated with appropriate drying agents, distilled, and stored under N<sub>2</sub>. 5,5'-dibromo-2,2'-bipyrimidine (bpm<sup>Br</sup>)<sup>1</sup> and [Pd(cod)MeCl]<sup>2</sup> were prepared according to the published procedures. Other chemicals were purchased and used as received. <sup>1</sup>H (400 MHz), <sup>31</sup>P (162 MHz), <sup>13</sup>C (100 MHz) NMR spectra were acquired on a JEOL JNM-AL400 FT-NMR spectrometer and a Bruker AVANCE III 600 FT-NMR spectrometers. Electrospray ionization (ESI) mass spectra were recorded on a Bruker MicroTOF II mass spectrometers. UV-vis, and steady-state emission spectra were obtained on a JASCO V-670 and HITACHI F-7000 spectrometer, respectively. Gel Permeation Chromatography (GPC) spectra were recorded on SHIMADZU LC-10ADvp in THF vs. polystyrene standard. Emission lifetime was measured on Hamamatsu Photonics Quantaaurus Tau.

**Computational Details.** DFT calculations were performed using the Gaussian-16 Revision A.03 quantum chemistry program package<sup>i</sup> at the B3LYP/LanL2DZ level<sup>ii,iii</sup>. We used the LanL2DZ pseudo-potential for Ir, 6-31G(d)<sup>iv</sup> split-valence basis set for N and the C bonded to Ir, 6-31G split-valence basis set for Br, and 3-21G<sup>v</sup> for the other C and H atoms. The orbital energies were determined by using minimized singlet geometries to approximate the ground state.

### Preparation of 4-methyl-2-(3-(naphthalen-2-yl)phenyl)pyridine (L1).

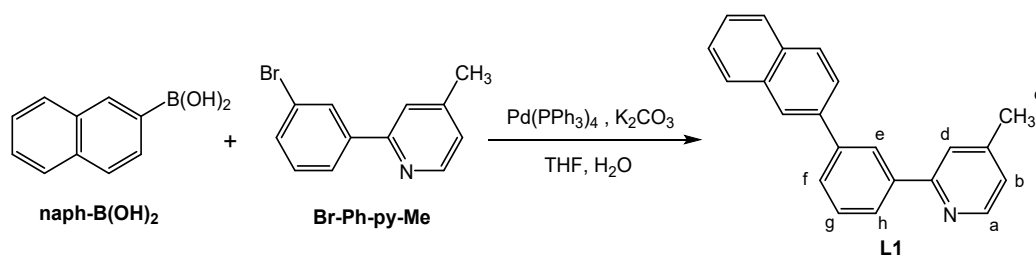

2-Naphthyl boronic acid (1.20 g, 0.00695 mol), K<sub>2</sub>CO<sub>3</sub> (5.28 g, 0.0382 mol, 5.5 eq) and Pd(PPh<sub>3</sub>)<sub>4</sub> (401.6 mg, 0.000348 mol, 0.05 eq) were dissolved in THF (110 mL) and H<sub>2</sub>O (10 mL) in a 300 mL 2-necked flask. 2-(3-bromophenyl)-4-methylpyridine (1.7361 g, 0.00700 mol) was added and refluxed for 17 h at 100 °C under N<sub>2</sub>. After cooled to room temperature, water (30 ml) was added and extracted with ethyl acetate (30 ml × 4) and then washed with brine. Collected organic layer was dried over MgSO<sub>4</sub>. After removal of the solvent, crude product was purified by silica-gel column chromatography (CH<sub>2</sub>Cl<sub>2</sub> / MeOH = 20 / 1) and HPLC to yield the

## Electronic Supporting Information

target compound as a pale-yellow oil (0.533 g, 0.00180 mol, 26.0%).  $^1\text{H}$  NMR (400 MHz, r.t.,  $\text{CDCl}_3$ ,  $\delta$  / ppm): 8.59 (d,  $J = 4.8$  Hz, 1 H, a), 8.34 (t,  $J = 1.8$  Hz, 1 H, g), 8.14 (s, 1 H, d), 7.99 – 7.82 (m, 5 H, *naphthyl*), 7.77 (m, 1 H, f), 7.64 (s, 1 H, e), 7.58 (t,  $J = 8.0$  Hz, 1 H, h), 7.53 – 7.46 (m, 2 H, *naphthyl*), 7.09 (dd,  $J = 4.8$  Hz, 1 H, b) 2.44 (s, 3 H, c).

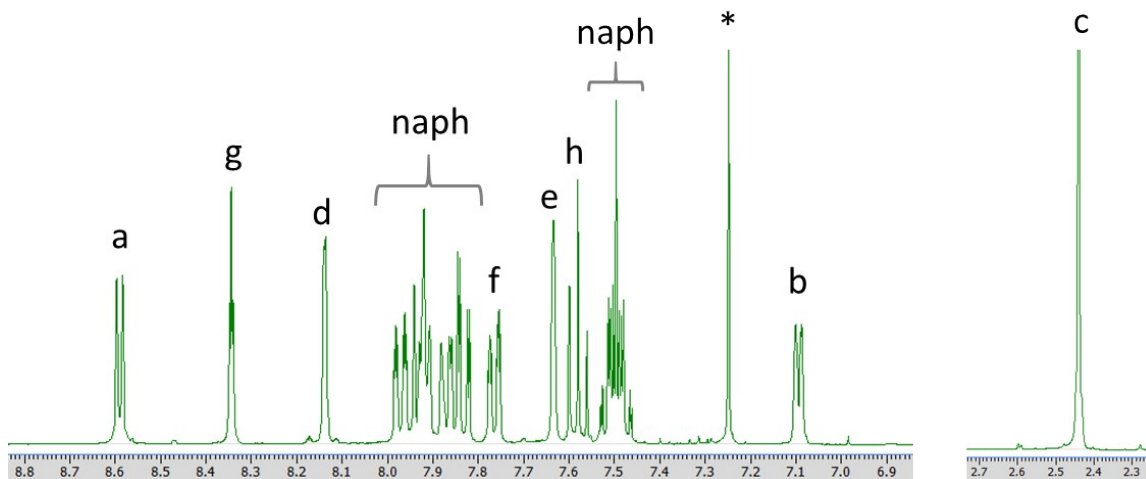

Figure S1.  $^1\text{H}$  NMR spectra of **L1** (400 MHz, r.t.,  $\text{CDCl}_3$ ).

### Preparation of 1-Me.

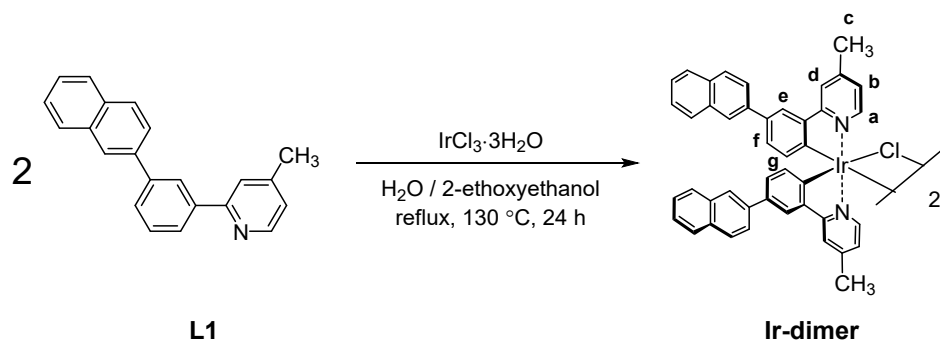

$[\text{Ir}(\mathbf{L1})_2(\text{bpm}^{\text{Br}})](\text{BF}_4)$  was prepared in a similar fashion to the published procedure for the synthesis of  $[\text{Ir}(\text{C}^{\wedge}\text{N})_2(\text{N}^{\wedge}\text{N})]^+$ .<sup>3</sup>

$\text{IrCl}_3 \cdot 3\text{H}_2\text{O}$  (0.317 g, 0.90 mmol) and 4-methyl-2-(3-(naphthalen-2-yl)phenyl)pyridine (**L1**: 0.533 g, 1.80 mmol) were dissolved in 2-ethoxyethanol (10 mL) and  $\text{H}_2\text{O}$  (3.3 mL), and refluxed under  $\text{N}_2$  for 24 h at 130 °C. The precipitate was filtered, washed with  $\text{H}_2\text{O}$  and EtOH, and then dried up to afford  $[\text{Ir}(\mathbf{L1})_2\text{Cl}]_2$  as a yellow solid (0.511 g, 0.313 mmol, 69.5%).  $^1\text{H}$  NMR (400 MHz, r.t.,  $\text{CDCl}_3$ ,  $\delta$  / ppm): 9.17 (d,  $J = 6.0$  Hz, 4 H, a), 7.88 (s, 4 H, d), 7.83 – 7.77 (m, 16 H, *naphthyl*), 7.61 (dd,  $J = 8.4$  Hz, 1.6 Hz, 4 H, f), 7.51 – 7.37 (m, 12 H, *naphthyl*), 6.97

## Electronic Supporting Information

(dd,  $J = 8.4$  Hz, 1.6 Hz, 4 H, e), 6.67 (d,  $J = 6.0$  Hz, 4 H, b), 6.17 (d,  $J = 8.0$  Hz, 4 H, g), 2.71 (s, 12 H, c).

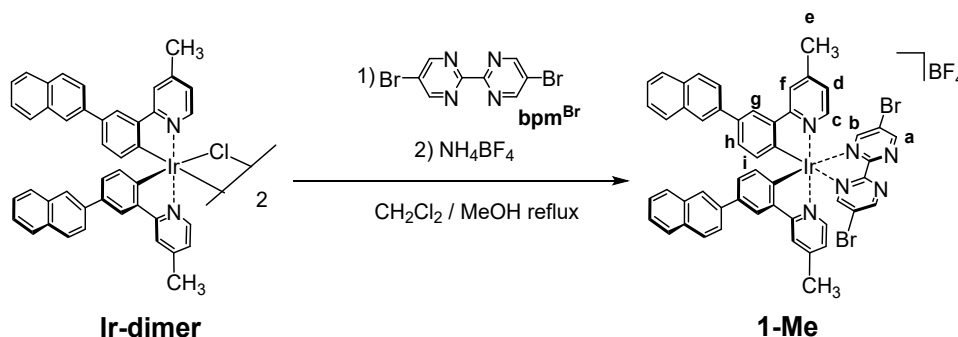

[Ir(**L1**)<sub>2</sub>Cl]<sub>2</sub> (0.373 g, 0.229 mmol) and 5,5'-dibromo-2,2'-bipyrimidine (0.151 g, 0.480 mmol, 0.5eq) were dissolved in CH<sub>2</sub>Cl<sub>2</sub> (18 mL) and MeOH (8 mL), and refluxed under N<sub>2</sub> for 5 h at 50 °C. The mixture was concentrated under vacuum and stirred with an excess amount of NH<sub>4</sub>BF<sub>4</sub> (0.240 g, 2.29 mmol, 10 eq) at ambient temperature for 24 h. The precipitate was filtered and washed with EtOH, water, and Et<sub>2</sub>O. The resulting solid was purified by column chromatography packed with neutral aluminum oxide (CH<sub>2</sub>Cl<sub>2</sub> / CH<sub>3</sub>CN = 2 : 1). The eluted pale orange band was collected and dried up under vacuum. The obtained solid was dissolved in CH<sub>2</sub>Cl<sub>2</sub> and a slow diffusion of hexane yielded [Ir(**L1**)<sub>2</sub>(bpm<sup>Br</sup>)](BF<sub>4</sub>) as a dark-red solid (0.249 g, 0.211 mmol, 46.0%).

<sup>1</sup>H NMR (400 MHz, CD<sub>3</sub>CN, r.t.,  $\delta$  / ppm) : 9.27 (d,  $J = 2.8$  Hz, 2 H, a), 8.26 (d,  $J = 2.8$  Hz, 2 H, b), 8.23 (d,  $J = 1.6$  Hz, 2 H, *naphthyl*) 8.17 (s, 4 H, g, *naphthyl*), 7.95 – 7.83 (m, 8 H, f, *naphthyl*), 7.68 (d,  $J = 6.0$  Hz, 2 H, c), 7.52 – 7.45 (m, 4 H, *naphthyl*), 7.37 (dd,  $J = 8.0$  Hz, 1.6 Hz, 2 H, h), 6.38 (d,  $J = 8.0$  Hz, 2 H, i), 2.55 (s, 6 H, e). ESI-MS (CH<sub>3</sub>CN) :  $m/z = 1069$  [M – BF<sub>4</sub>]<sup>+</sup>. <sup>13</sup>C NMR (100 MHz, CD<sub>3</sub>CN, r.t.,  $\delta$  / ppm) :  $\delta$  166.0 (C15), 160.6 (C14), 159.9 (C5), 158.3 (C12), 151.6 (C1), 149.8 (C3), 146.4 (C6), 145.2 (C8), 138.1 (C16), 135.9 (C19), 133.9 (C18), 132.5 (C11), 132.3 (C10), 129.1 (*naphthyl*), 128.5 (*naphthyl*), 128.0 (*naphthyl*), 127.6 (*naphthyl*), 126.5 (*naphthyl*), 126.0 (C9), 125.2 (C7), 124.9 (C17), 124.7 (s, C2), 123.5 (C4), 121.4 (C13), 20.4 (py-CH<sub>3</sub>). Anal. Found (calcd for C<sub>52</sub>H<sub>36</sub>BBr<sub>2</sub>F<sub>4</sub>IrN<sub>6</sub> + CH<sub>2</sub>Cl<sub>2</sub>): C, 50.19 (50.18); H, 3.18 (3.02); N, 6.51 (6.62).

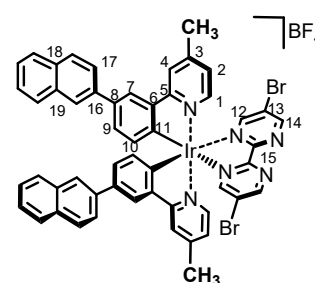

carbon label

## Electronic Supporting Information

### X-ray Structural Determinations.

The diffraction data of **1-Me** were collected on a Rigaku XtaLAB P100 diffractometer with graphite monochromated MoK $\alpha$ ( $\lambda=0.71073\text{\AA}$ ). The data were collected at a temperature of  $-175 \pm 1^\circ\text{C}$  to a maximum  $2\theta$  value of  $55.1^\circ$ . The crystal-to-detector distance was 45.00 mm. Readout was performed in the 0.172 mm pixel mode. Data were collected and processed using CrystalClear (Rigaku).<sup>1</sup> An empirical absorption correction was applied. The data were corrected for Lorentz and polarization effects.

The crystal structures were solved by direct method (SHELXS-97<sup>2</sup> or SHELXT<sup>3</sup>) and expanded using Fourier techniques, which are subsequently completed by Fourier recycling using the SHELXL 2014 program.<sup>3</sup> Non-hydrogen atoms were refined by anisotropic displacement parameters. Crystallographic data, data collection and refinement parameters for **1-Me** are listed in Table S1 and bond lengths and angles are listed in Table S2.

(1) CrystalClear: Data Collection and Processing Software, Rigaku Corporation (1998-2015). Tokyo 196-8666, Japan.

(2) SHELXS Version 2013/1: Sheldrick, G. M. (2008). Acta Cryst. A64, 112-122.

(3) SHELXT Version 2014/5: Sheldrick, G. M. (2014). Acta Cryst. A70, C1437.

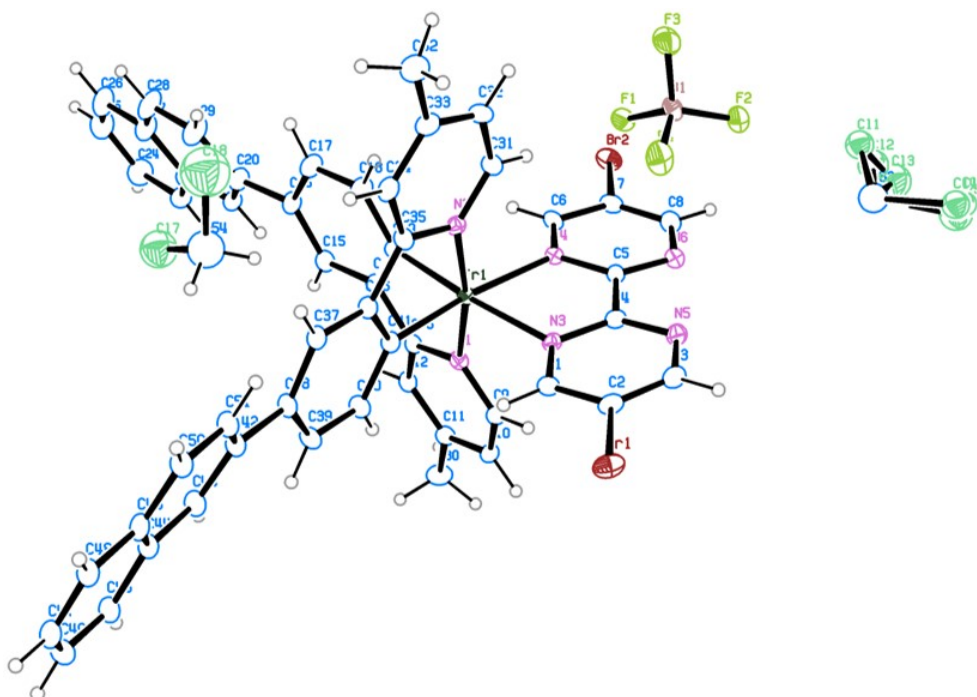

Figure S2. ORTEP diagram of **1-Me**.

## Electronic Supporting Information

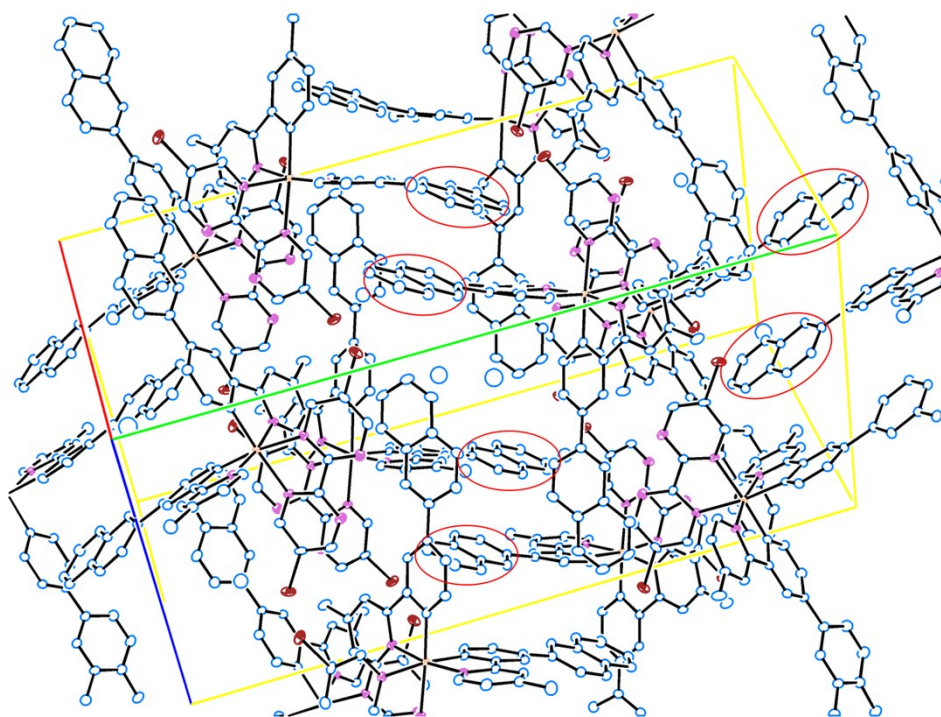

Figure S3.

ORTEP diagram (unit cell contents) of **1-Me** ( $\text{BF}_4$  anions and a part of the solvent molecules are omitted for clarity)

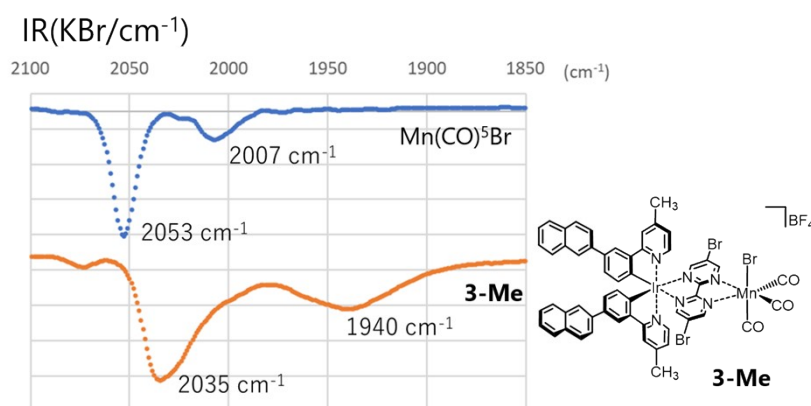

Figure S4. IR spectra of **3-Me** (KBr /  $\text{cm}^{-1}$ ).

## Electronic Supporting Information

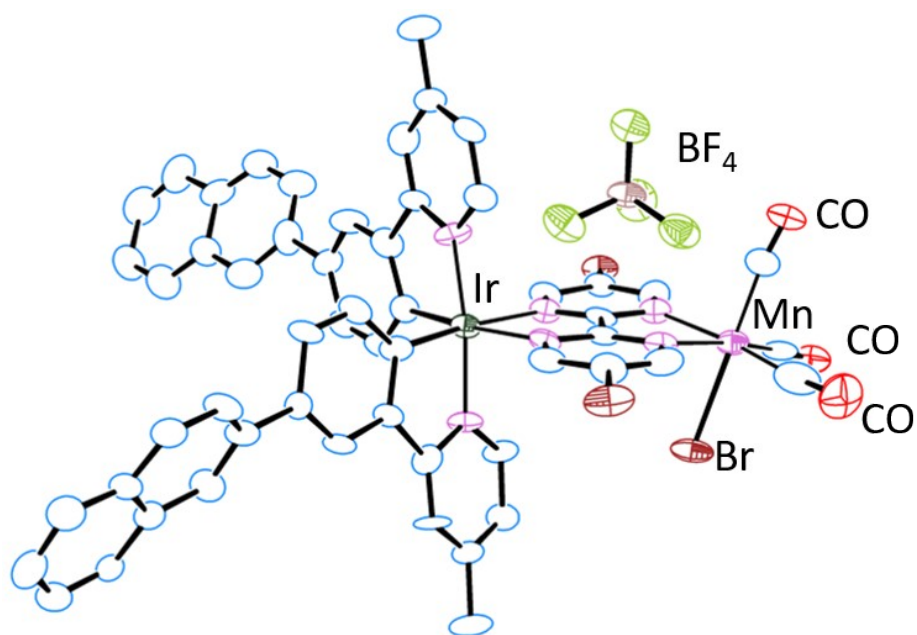

Figure S5. ORTEP diagram of **3-Me** (preliminary data,  $R1 = 0.15$ ,  $I > 2\sigma$ ).

## Electronic Supporting Information

Table S1. Crystal data and structure refinement for **1-Me**.

| Complex                           | <b>1-Me</b>                                                                                        | <b>3-Me</b>                                                                                                          |
|-----------------------------------|----------------------------------------------------------------------------------------------------|----------------------------------------------------------------------------------------------------------------------|
| Empirical formula                 | C <sub>54</sub> H <sub>38</sub> B Br <sub>2</sub> Cl <sub>4</sub> F <sub>4</sub> Ir N <sub>6</sub> | C <sub>58</sub> H <sub>36</sub> B Br <sub>3</sub> Cl <sub>4</sub> F <sub>4</sub> Ir Mn N <sub>6</sub> O <sub>3</sub> |
| Formula weight                    | 1351.53                                                                                            | 1580.41                                                                                                              |
| Temperature                       | 98(2) K                                                                                            | 98(2) K                                                                                                              |
| Wavelength                        | 0.71073 Å                                                                                          | 0.71073 Å                                                                                                            |
| Crystal system                    | Monoclinic                                                                                         | Triclinic                                                                                                            |
| Space group                       | <i>P</i> 2 <sub>1</sub> / <i>n</i>                                                                 | <i>P</i> -1                                                                                                          |
| Unit cell dimensions              | a = 11.8536(3) Å<br>b = 29.5795(7) Å<br>c = 14.4519(3) Å                                           | a = 10.8988(8) Å<br>b = 13.9899(10) Å<br>c = 20.7879(13) Å                                                           |
|                                   | α = 90°<br>β = 98.703(2)°<br>γ = 90°                                                               | α = 73.462(6)°<br>β = 83.849(6)°<br>γ = 83.067(6)°                                                                   |
| Volume                            | 5008.8(2) Å <sup>3</sup>                                                                           | 3007.4(4) Å <sup>3</sup>                                                                                             |
| Z                                 | 4                                                                                                  | 2                                                                                                                    |
| Density (calculated)              | 1.792 Mg/m <sup>3</sup>                                                                            | 1.745 Mg/m <sup>3</sup>                                                                                              |
| Absorption coefficient            | 4.535 mm <sup>-1</sup>                                                                             | 4.652 mm <sup>-1</sup>                                                                                               |
| F(000)                            | 2640                                                                                               | 1532                                                                                                                 |
| Crystal size                      | 0.730 x 0.280 x 0.080 mm <sup>3</sup>                                                              | 0.620 x 0.120 x 0.020 mm <sup>3</sup>                                                                                |
| Theta range for data collection   | 2.506 to 27.499°                                                                                   | 2.537 to 27.500°                                                                                                     |
| Index ranges                      | -14 ≤ h ≤ 15, -36 ≤ k ≤ 38, -17 ≤ l ≤ 18                                                           | -13 ≤ h ≤ 14, -17 ≤ k ≤ 17, -26 ≤ l ≤ 25                                                                             |
| Reflections collected             | 41028                                                                                              | 42430                                                                                                                |
| Independent reflections           | 10680 [R(int) = 0.0337]                                                                            | 12565 [R(int) = 0.1797]                                                                                              |
| Completeness to theta = 27.50°    | 99.7 %                                                                                             | 99.0 %                                                                                                               |
| Refinement method                 | Full-matrix least-squares on F <sup>2</sup>                                                        | Full-matrix least-squares on F <sup>2</sup>                                                                          |
| Data / restraints / parameters    | 10680 / 0 / 637                                                                                    | 12565 / 0 / 709                                                                                                      |
| Goodness-of-fit on F <sup>2</sup> | 1.110                                                                                              | 1.220                                                                                                                |
| Final R indices [I > 2σ(I)]       | R <sub>1</sub> = 0.0469, wR <sub>2</sub> = 0.1268                                                  | R <sub>1</sub> = 0.1468, wR <sub>2</sub> = 0.3556                                                                    |
| R indices (all data)              | R <sub>1</sub> = 0.0495, wR <sub>2</sub> = 0.1279                                                  | R <sub>1</sub> = 0.2208, wR <sub>2</sub> = 0.3942                                                                    |
| Largest diff. peak and hole       | 2.578 and -2.503 e.Å <sup>-3</sup>                                                                 | 6.205 and -2.274 e.Å <sup>-3</sup>                                                                                   |



## Electronic Supporting Information

Table S2. Bond lengths [ $\text{\AA}$ ] and angles [ $^\circ$ ] for **1-Me**.

|             |           |              |           |
|-------------|-----------|--------------|-----------|
| Ir(1)-C(41) | 2.002(6)  | C(11)-C(30)  | 1.504(9)  |
| Ir(1)-C(19) | 2.003(6)  | C(12)-C(13)  | 1.393(9)  |
| Ir(1)-N(1)  | 2.052(5)  | C(12)-H(12)  | 0.9500    |
| Ir(1)-N(2)  | 2.054(5)  | C(13)-C(14)  | 1.480(9)  |
| Ir(1)-N(4)  | 2.156(5)  | C(14)-C(15)  | 1.404(9)  |
| Ir(1)-N(3)  | 2.166(5)  | C(14)-C(19)  | 1.420(9)  |
| N(1)-C(9)   | 1.341(8)  | C(15)-C(16)  | 1.406(9)  |
| N(1)-C(13)  | 1.366(7)  | C(15)-H(15)  | 0.9500    |
| N(2)-C(31)  | 1.343(8)  | C(16)-C(17)  | 1.397(10) |
| N(2)-C(35)  | 1.366(8)  | C(16)-C(20)  | 1.487(9)  |
| N(3)-C(1)   | 1.347(8)  | C(17)-C(18)  | 1.391(9)  |
| N(3)-C(4)   | 1.351(8)  | C(17)-H(17)  | 0.9500    |
| N(4)-C(6)   | 1.338(8)  | C(18)-C(19)  | 1.400(9)  |
| N(4)-C(5)   | 1.352(8)  | C(18)-H(18)  | 0.9500    |
| N(5)-C(3)   | 1.328(9)  | C(20)-C(21)  | 1.356(10) |
| N(5)-C(4)   | 1.335(8)  | C(20)-C(29)  | 1.424(10) |
| N(6)-C(5)   | 1.328(8)  | C(21)-C(22)  | 1.418(9)  |
| N(6)-C(8)   | 1.349(9)  | C(21)-H(21)  | 0.9500    |
| C(1)-C(2)   | 1.396(9)  | C(22)-C(27)  | 1.408(10) |
| C(1)-H(1)   | 0.9500    | C(22)-C(23)  | 1.450(10) |
| C(2)-C(3)   | 1.372(10) | C(23)-C(24)  | 1.342(10) |
| C(2)-Br(1)  | 1.866(6)  | C(23)-H(23)  | 0.9500    |
| C(3)-H(3)   | 0.9500    | C(24)-C(25)  | 1.402(12) |
| C(4)-C(5)   | 1.485(8)  | C(24)-H(24)  | 0.9500    |
| C(6)-C(7)   | 1.382(9)  | C(25)-C(26)  | 1.338(12) |
| C(6)-H(6)   | 0.9500    | C(25)-H(25)  | 0.9500    |
| C(7)-C(8)   | 1.366(10) | C(26)-C(27)  | 1.436(10) |
| C(7)-Br(2)  | 1.875(6)  | C(26)-H(26)  | 0.9500    |
| C(8)-H(8)   | 0.9500    | C(27)-C(28)  | 1.417(12) |
| C(9)-C(10)  | 1.376(9)  | C(28)-C(29)  | 1.374(11) |
| C(9)-H(9)   | 0.9500    | C(28)-H(28)  | 0.9500    |
| C(10)-C(11) | 1.389(8)  | C(29)-H(29)  | 0.9500    |
| C(10)-H(10) | 0.9500    | C(30)-H(30)  | 0.9800    |
| C(11)-C(12) | 1.381(9)  | C(30)-H(30A) | 0.9800    |

## Electronic Supporting Information

|              |           |                   |           |
|--------------|-----------|-------------------|-----------|
| C(30)-H(30B) | 0.9800    | C(50)-H(50)       | 0.9500    |
| C(31)-C(32)  | 1.376(9)  | C(51)-H(51)       | 0.9500    |
| C(31)-H(31)  | 0.9500    | C(52)-H(52)       | 0.9800    |
| C(32)-C(33)  | 1.393(10) | C(52)-H(52A)      | 0.9800    |
| C(32)-H(32)  | 0.9500    | C(52)-H(52B)      | 0.9800    |
| C(33)-C(34)  | 1.395(10) | B(1)-F(3)         | 1.374(9)  |
| C(33)-C(52)  | 1.504(9)  | B(1)-F(2)         | 1.379(9)  |
| C(34)-C(35)  | 1.382(9)  | B(1)-F(4)         | 1.401(9)  |
| C(34)-H(34)  | 0.9500    | B(1)-F(1)         | 1.403(8)  |
| C(35)-C(36)  | 1.477(8)  | C(53)-Cl(6)       | 1.650(17) |
| C(36)-C(37)  | 1.398(9)  | C(53)-Cl(2)       | 1.758(14) |
| C(36)-C(41)  | 1.405(8)  | C(53)-Cl(1)       | 1.772(13) |
| C(37)-C(38)  | 1.404(9)  | C(53)-Cl(4)       | 1.781(14) |
| C(37)-H(37)  | 0.9500    | C(53)-Cl(5)       | 1.816(14) |
| C(38)-C(39)  | 1.400(9)  | C(53)-Cl(3)       | 1.892(15) |
| C(38)-C(42)  | 1.499(9)  | Cl(1)-Cl(2)       | 0.540(13) |
| C(39)-C(40)  | 1.384(9)  | Cl(1)-Cl(3)       | 1.082(15) |
| C(39)-H(39)  | 0.9500    | Cl(2)-Cl(3)       | 0.555(14) |
| C(40)-C(41)  | 1.409(9)  | Cl(4)-Cl(6)       | 0.526(15) |
| C(40)-H(40)  | 0.9500    | Cl(7)-C(54)       | 1.647(14) |
| C(42)-C(43)  | 1.393(9)  | Cl(8)-C(54)       | 1.757(14) |
| C(42)-C(51)  | 1.413(9)  | C(54)-H(54)       | 0.9900    |
| C(43)-C(44)  | 1.420(9)  | C(54)-H(54A)      | 0.9900    |
| C(43)-H(43)  | 0.9500    |                   |           |
| C(44)-C(49)  | 1.421(9)  | C(41)-Ir(1)-C(19) | 88.7(2)   |
| C(44)-C(45)  | 1.432(9)  | C(41)-Ir(1)-N(1)  | 94.5(2)   |
| C(45)-C(46)  | 1.350(10) | C(19)-Ir(1)-N(1)  | 80.1(2)   |
| C(45)-H(45)  | 0.9500    | C(41)-Ir(1)-N(2)  | 79.9(2)   |
| C(46)-C(47)  | 1.412(11) | C(19)-Ir(1)-N(2)  | 92.2(2)   |
| C(46)-H(46)  | 0.9500    | N(1)-Ir(1)-N(2)   | 170.6(2)  |
| C(47)-C(48)  | 1.356(10) | C(41)-Ir(1)-N(4)  | 171.9(2)  |
| C(47)-H(47)  | 0.9500    | C(19)-Ir(1)-N(4)  | 99.4(2)   |
| C(48)-C(49)  | 1.425(9)  | N(1)-Ir(1)-N(4)   | 86.80(19) |
| C(48)-H(48)  | 0.9500    | N(2)-Ir(1)-N(4)   | 99.82(19) |
| C(49)-C(50)  | 1.413(10) | C(41)-Ir(1)-N(3)  | 96.1(2)   |
| C(50)-C(51)  | 1.364(9)  | C(19)-Ir(1)-N(3)  | 175.1(2)  |

## Electronic Supporting Information

|                  |            |                   |          |
|------------------|------------|-------------------|----------|
| N(1)-Ir(1)-N(3)  | 100.50(19) | C(8)-C(7)-Br(2)   | 120.8(5) |
| N(2)-Ir(1)-N(3)  | 87.62(19)  | C(6)-C(7)-Br(2)   | 120.1(5) |
| N(4)-Ir(1)-N(3)  | 75.83(19)  | N(6)-C(8)-C(7)    | 121.8(6) |
| C(9)-N(1)-C(13)  | 119.0(5)   | N(6)-C(8)-H(8)    | 119.1    |
| C(9)-N(1)-Ir(1)  | 124.5(4)   | C(7)-C(8)-H(8)    | 119.1    |
| C(13)-N(1)-Ir(1) | 116.5(4)   | N(1)-C(9)-C(10)   | 122.1(6) |
| C(31)-N(2)-C(35) | 119.1(5)   | N(1)-C(9)-H(9)    | 118.9    |
| C(31)-N(2)-Ir(1) | 124.3(4)   | C(10)-C(9)-H(9)   | 118.9    |
| C(35)-N(2)-Ir(1) | 116.3(4)   | C(9)-C(10)-C(11)  | 120.1(6) |
| C(1)-N(3)-C(4)   | 117.6(5)   | C(9)-C(10)-H(10)  | 120.0    |
| C(1)-N(3)-Ir(1)  | 125.8(4)   | C(11)-C(10)-H(10) | 120.0    |
| C(4)-N(3)-Ir(1)  | 116.0(4)   | C(12)-C(11)-C(10) | 117.8(6) |
| C(6)-N(4)-C(5)   | 117.5(5)   | C(12)-C(11)-C(30) | 121.5(6) |
| C(6)-N(4)-Ir(1)  | 125.8(4)   | C(10)-C(11)-C(30) | 120.6(6) |
| C(5)-N(4)-Ir(1)  | 116.4(4)   | C(11)-C(12)-C(13) | 120.5(6) |
| C(3)-N(5)-C(4)   | 116.2(6)   | C(11)-C(12)-H(12) | 119.8    |
| C(5)-N(6)-C(8)   | 116.0(6)   | C(13)-C(12)-H(12) | 119.8    |
| N(3)-C(1)-C(2)   | 119.5(6)   | N(1)-C(13)-C(12)  | 120.5(6) |
| N(3)-C(1)-H(1)   | 120.2      | N(1)-C(13)-C(14)  | 113.6(5) |
| C(2)-C(1)-H(1)   | 120.2      | C(12)-C(13)-C(14) | 125.9(5) |
| C(3)-C(2)-C(1)   | 118.3(6)   | C(15)-C(14)-C(19) | 122.2(6) |
| C(3)-C(2)-Br(1)  | 121.0(5)   | C(15)-C(14)-C(13) | 123.6(6) |
| C(1)-C(2)-Br(1)  | 120.7(5)   | C(19)-C(14)-C(13) | 114.1(5) |
| N(5)-C(3)-C(2)   | 122.8(6)   | C(14)-C(15)-C(16) | 120.1(6) |
| N(5)-C(3)-H(3)   | 118.6      | C(14)-C(15)-H(15) | 119.9    |
| C(2)-C(3)-H(3)   | 118.6      | C(16)-C(15)-H(15) | 119.9    |
| N(5)-C(4)-N(3)   | 125.6(6)   | C(17)-C(16)-C(15) | 117.7(6) |
| N(5)-C(4)-C(5)   | 118.9(6)   | C(17)-C(16)-C(20) | 120.9(6) |
| N(3)-C(4)-C(5)   | 115.5(5)   | C(15)-C(16)-C(20) | 121.4(6) |
| N(6)-C(5)-N(4)   | 125.7(6)   | C(18)-C(17)-C(16) | 121.9(6) |
| N(6)-C(5)-C(4)   | 118.6(5)   | C(18)-C(17)-H(17) | 119.0    |
| N(4)-C(5)-C(4)   | 115.6(5)   | C(16)-C(17)-H(17) | 119.0    |
| N(4)-C(6)-C(7)   | 119.9(6)   | C(17)-C(18)-C(19) | 121.7(6) |
| N(4)-C(6)-H(6)   | 120.0      | C(17)-C(18)-H(18) | 119.1    |
| C(7)-C(6)-H(6)   | 120.0      | C(19)-C(18)-H(18) | 119.1    |
| C(8)-C(7)-C(6)   | 119.0(6)   | C(18)-C(19)-C(14) | 116.2(6) |

## Electronic Supporting Information

|                    |          |                     |          |
|--------------------|----------|---------------------|----------|
| C(18)-C(19)-Ir(1)  | 128.2(5) | H(30)-C(30)-H(30B)  | 109.5    |
| C(14)-C(19)-Ir(1)  | 115.6(4) | H(30A)-C(30)-H(30B) | 109.5    |
| C(21)-C(20)-C(29)  | 118.2(6) | N(2)-C(31)-C(32)    | 122.4(6) |
| C(21)-C(20)-C(16)  | 122.7(6) | N(2)-C(31)-H(31)    | 118.8    |
| C(29)-C(20)-C(16)  | 119.1(6) | C(32)-C(31)-H(31)   | 118.8    |
| C(20)-C(21)-C(22)  | 121.9(6) | C(31)-C(32)-C(33)   | 119.8(6) |
| C(20)-C(21)-H(21)  | 119.1    | C(31)-C(32)-H(32)   | 120.1    |
| C(22)-C(21)-H(21)  | 119.1    | C(33)-C(32)-H(32)   | 120.1    |
| C(27)-C(22)-C(21)  | 119.6(6) | C(32)-C(33)-C(34)   | 117.4(6) |
| C(27)-C(22)-C(23)  | 118.1(6) | C(32)-C(33)-C(52)   | 121.1(6) |
| C(21)-C(22)-C(23)  | 122.2(6) | C(34)-C(33)-C(52)   | 121.4(7) |
| C(24)-C(23)-C(22)  | 120.6(7) | C(35)-C(34)-C(33)   | 120.8(6) |
| C(24)-C(23)-H(23)  | 119.7    | C(35)-C(34)-H(34)   | 119.6    |
| C(22)-C(23)-H(23)  | 119.7    | C(33)-C(34)-H(34)   | 119.6    |
| C(23)-C(24)-C(25)  | 121.0(7) | N(2)-C(35)-C(34)    | 120.4(6) |
| C(23)-C(24)-H(24)  | 119.5    | N(2)-C(35)-C(36)    | 113.1(5) |
| C(25)-C(24)-H(24)  | 119.5    | C(34)-C(35)-C(36)   | 126.4(6) |
| C(26)-C(25)-C(24)  | 120.6(7) | C(37)-C(36)-C(41)   | 122.0(6) |
| C(26)-C(25)-H(25)  | 119.7    | C(37)-C(36)-C(35)   | 123.2(6) |
| C(24)-C(25)-H(25)  | 119.7    | C(41)-C(36)-C(35)   | 114.8(5) |
| C(25)-C(26)-C(27)  | 121.3(8) | C(36)-C(37)-C(38)   | 120.4(6) |
| C(25)-C(26)-H(26)  | 119.3    | C(36)-C(37)-H(37)   | 119.8    |
| C(27)-C(26)-H(26)  | 119.3    | C(38)-C(37)-H(37)   | 119.8    |
| C(22)-C(27)-C(28)  | 118.5(7) | C(39)-C(38)-C(37)   | 117.8(6) |
| C(22)-C(27)-C(26)  | 118.4(7) | C(39)-C(38)-C(42)   | 120.6(6) |
| C(28)-C(27)-C(26)  | 123.1(8) | C(37)-C(38)-C(42)   | 121.5(6) |
| C(29)-C(28)-C(27)  | 120.1(7) | C(40)-C(39)-C(38)   | 121.6(6) |
| C(29)-C(28)-H(28)  | 119.9    | C(40)-C(39)-H(39)   | 119.2    |
| C(27)-C(28)-H(28)  | 119.9    | C(38)-C(39)-H(39)   | 119.2    |
| C(28)-C(29)-C(20)  | 121.6(7) | C(39)-C(40)-C(41)   | 121.5(6) |
| C(28)-C(29)-H(29)  | 119.2    | C(39)-C(40)-H(40)   | 119.3    |
| C(20)-C(29)-H(29)  | 119.2    | C(41)-C(40)-H(40)   | 119.3    |
| C(11)-C(30)-H(30)  | 109.5    | C(36)-C(41)-C(40)   | 116.8(6) |
| C(11)-C(30)-H(30A) | 109.5    | C(36)-C(41)-Ir(1)   | 115.7(4) |
| H(30)-C(30)-H(30A) | 109.5    | C(40)-C(41)-Ir(1)   | 127.5(5) |
| C(11)-C(30)-H(30B) | 109.5    | C(43)-C(42)-C(51)   | 117.8(6) |

## Electronic Supporting Information

|                     |          |                    |          |
|---------------------|----------|--------------------|----------|
| C(43)-C(42)-C(38)   | 121.0(6) | F(3)-B(1)-F(4)     | 110.7(6) |
| C(51)-C(42)-C(38)   | 121.1(6) | F(2)-B(1)-F(4)     | 109.7(6) |
| C(42)-C(43)-C(44)   | 121.3(6) | F(3)-B(1)-F(1)     | 108.7(6) |
| C(42)-C(43)-H(43)   | 119.4    | F(2)-B(1)-F(1)     | 109.8(6) |
| C(44)-C(43)-H(43)   | 119.4    | F(4)-B(1)-F(1)     | 107.7(5) |
| C(43)-C(44)-C(49)   | 119.6(6) | Cl(6)-C(53)-Cl(2)  | 105.7(9) |
| C(43)-C(44)-C(45)   | 122.3(6) | Cl(6)-C(53)-Cl(1)  | 115.4(8) |
| C(49)-C(44)-C(45)   | 118.1(6) | Cl(2)-C(53)-Cl(1)  | 17.6(4)  |
| C(46)-C(45)-C(44)   | 121.4(7) | Cl(6)-C(53)-Cl(4)  | 17.1(6)  |
| C(46)-C(45)-H(45)   | 119.3    | Cl(2)-C(53)-Cl(4)  | 118.0(7) |
| C(44)-C(45)-H(45)   | 119.3    | Cl(1)-C(53)-Cl(4)  | 123.6(7) |
| C(45)-C(46)-C(47)   | 120.6(7) | Cl(6)-C(53)-Cl(5)  | 8.3(7)   |
| C(45)-C(46)-H(46)   | 119.7    | Cl(2)-C(53)-Cl(5)  | 107.1(8) |
| C(47)-C(46)-H(46)   | 119.7    | Cl(1)-C(53)-Cl(5)  | 114.4(7) |
| C(48)-C(47)-C(46)   | 119.8(6) | Cl(4)-C(53)-Cl(5)  | 11.6(5)  |
| C(48)-C(47)-H(47)   | 120.1    | Cl(6)-C(53)-Cl(3)  | 91.8(8)  |
| C(46)-C(47)-H(47)   | 120.1    | Cl(2)-C(53)-Cl(3)  | 17.0(5)  |
| C(47)-C(48)-C(49)   | 121.7(7) | Cl(1)-C(53)-Cl(3)  | 34.1(5)  |
| C(47)-C(48)-H(48)   | 119.1    | Cl(4)-C(53)-Cl(3)  | 106.3(7) |
| C(49)-C(48)-H(48)   | 119.1    | Cl(5)-C(53)-Cl(3)  | 94.7(7)  |
| C(50)-C(49)-C(44)   | 118.0(6) | Cl(2)-Cl(1)-Cl(3)  | 9.1(17)  |
| C(50)-C(49)-C(48)   | 123.6(6) | Cl(2)-Cl(1)-C(53)  | 79.7(16) |
| C(44)-C(49)-C(48)   | 118.4(6) | Cl(3)-Cl(1)-C(53)  | 79.0(8)  |
| C(51)-C(50)-C(49)   | 121.3(6) | Cl(1)-Cl(2)-Cl(3)  | 162(3)   |
| C(51)-C(50)-H(50)   | 119.4    | Cl(1)-Cl(2)-C(53)  | 82.7(17) |
| C(49)-C(50)-H(50)   | 119.4    | Cl(3)-Cl(2)-C(53)  | 95(2)    |
| C(50)-C(51)-C(42)   | 122.0(6) | Cl(2)-Cl(3)-Cl(1)  | 8.9(16)  |
| C(50)-C(51)-H(51)   | 119.0    | Cl(2)-Cl(3)-C(53)  | 67.6(18) |
| C(42)-C(51)-H(51)   | 119.0    | Cl(1)-Cl(3)-C(53)  | 66.8(7)  |
| C(33)-C(52)-H(52)   | 109.5    | Cl(6)-Cl(4)-C(53)  | 67(2)    |
| C(33)-C(52)-H(52A)  | 109.5    | Cl(4)-Cl(6)-C(53)  | 96(2)    |
| H(52)-C(52)-H(52A)  | 109.5    | Cl(7)-C(54)-Cl(8)  | 117.5(9) |
| C(33)-C(52)-H(52B)  | 109.5    | Cl(7)-C(54)-H(54)  | 107.9    |
| H(52)-C(52)-H(52B)  | 109.5    | Cl(8)-C(54)-H(54)  | 107.9    |
| H(52A)-C(52)-H(52B) | 109.5    | Cl(7)-C(54)-H(54A) | 107.9    |
| F(3)-B(1)-F(2)      | 110.2(6) | Cl(8)-C(54)-H(54A) | 107.9    |

## Electronic Supporting Information

H(54)-C(54)-H(54A)

107.2

Symmetry transformations used to generate  
equivalent atoms:

---

## Electronic Supporting Information

Palladation of  $[\text{Ir}(\mathbf{L1})_2(\text{bpm}^{\text{Br}})](\text{BF}_4)$  was implemented in a similar fashion to the published procedure for the synthesis of the Ru-Pd complex.<sup>4</sup>  $[\text{Ir}(\mathbf{L1})_2(\text{bpm}^{\text{Br}})](\text{BF}_4)$  (57.2 mg, 0.0483 mmol) and  $[\text{PdMeCl}(\text{cod})]$  (15.4 mg, 0.0580 mmol, 1.2 eq) were dissolved in  $\text{CH}_2\text{Cl}_2$  (3 mL) and stirred at ambient temperature for 3 h. The solvent was removed under reduced pressure and the resulting solid was precipitated with  $\text{CH}_2\text{Cl}_2\text{-Et}_2\text{O}$  and washed with toluene and  $\text{Et}_2\text{O}$ , which yielded  $[\text{Ir}(\text{Ph}^{\text{naphpy}^{\text{Me}}})_2(\text{bpm}^{\text{Br}})\text{PdMeCl}](\text{BF}_4)_2$  as a brownish-red solid (43.9 mg, 0.0327 mmol, 67.7%).

$^1\text{H NMR}$  (400 MHz, r.t.,  $\text{CD}_3\text{NO}_2$ ,  $\delta$  / ppm) :  $\delta$  9.33, 9.18 (s, 2 H, H14), 8.82, 8.78 (s, 2 H, H12), 8.28 (s, 2 H, H7), 8.17 (d,  $J = 12.8$  Hz, 2 H, *naphthyl*), 7.97 – 7.79 (m, 10 H, *naphthyl*, H1, H4), 7.54 – 7.47 (m, 4 H, *naphthyl*), 7.41 (d,  $J = 7.2$  Hz, 2 H, H9), 7.05 (d,  $J = 5.6$  Hz, 2 H, H2), 6.50 (dd,  $J = 7.2$  Hz, 3.6 Hz, 2 H, H10), 2.61 (s, 6 H, H3), 1.17 (s, 3 H, Pd- $\text{CH}_3$ ).

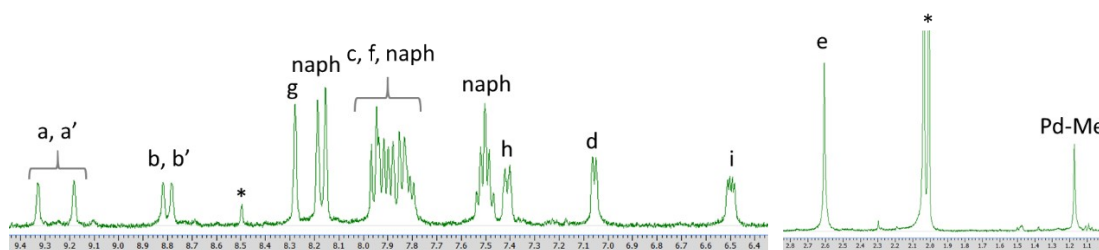

Figure S6.  $^1\text{H NMR}$  spectra of  $[\text{Ir}(\mathbf{L1})_2(\text{bpm}^{\text{Br}})\text{PdMeCl}](\text{BF}_4)_2$  (400 MHz, r.t.,  $\text{CD}_3\text{NO}_2$ ).

Preparation of  $[\text{Ir}(\mathbf{L1})_2(\text{bpm}^{\text{Br}})\text{PdMe}(\text{Me}_2\text{CO})](\text{BF}_4)_2$  (**2-Me**).

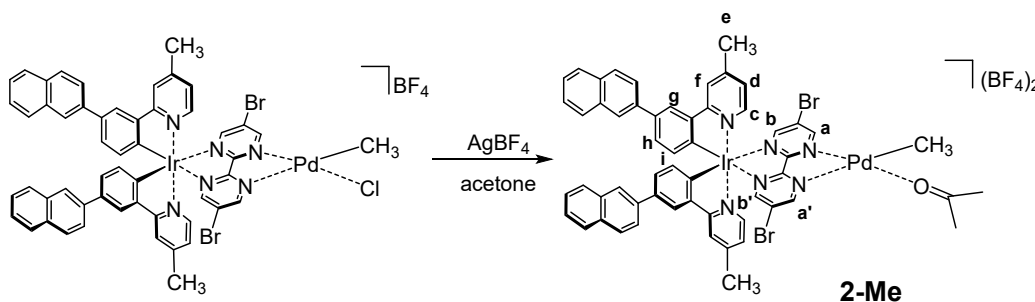

$[\text{Ir}(\mathbf{L1})_2(\text{bpm}^{\text{Br}})\text{PdMeCl}](\text{BF}_4)_2$  (43.9 mg, 0.0327 mmol) was dissolved in acetone (5 mL) and acetone (1 mL) solution of  $\text{AgBF}_4$  (6.69 mg, 0.0344 mmol, 1.05 eq) was added. The mixture was stirred at ambient temperature for 1 h. The resulting solution was filtered through Celite and the filtrate was concentrated under vacuum. Then the resulting solution was precipitated with  $\text{CH}_2\text{Cl}_2\text{-Et}_2\text{O}$ . It gave the target compound **1** as a brownish-red solid (37.0 mg, 0.0255 mmol, 78.1%).

$^1\text{H NMR}$  (400 MHz,  $\text{CD}_3\text{NO}_2$ , r.t.,  $\delta$  / ppm) : 9.16 (brs, 2 H, a, a'), 8.86 (brs, 2 H, b, b'), 8.28 (s, 2 H, g), 8.20 – 8.15 (m, 4 H, *naphthyl*), 7.97 – 7.81 (m, 10 H, c, f, *naphthyl*), 7.54 – 7.47 (m, 4 H,

## Electronic Supporting Information

*naphthyl*), 7.42 (d,  $J = 8.0$  Hz, 2 H, h), 7.08 (d,  $J = 5.6$  Hz, 2 H, d), 6.48 (d,  $J = 8.0$  Hz, 2 H, i), 2.62 (s, 6 H, e), 1.48 (brs, 3 H, Pd-CH<sub>3</sub>).

<sup>13</sup>C NMR (100 MHz, CD<sub>3</sub>CN, r.t.,  $\delta$  / ppm) :  $\delta$  166.0 (C15), 160.6 (C14), 159.9 (C5), 158.2 (C12), 151.6 (C1), 149.8 (C3), 146.3 (C6), 145.2 (C8), 138.1 (C16), 135.9 (C19), 133.9 (C18), 132.5 (C11), 132.3 (C10), 129.1 (*naphthyl*), 128.5 (*naphthyl*), 128.0 (*naphthyl*), 127.6 (*naphthyl*), 126.5 (*naphthyl*), 126.0 (C9), 125.2 (C7), 124.9 (C17), 124.7 (C2), 123.5 (C4), 121.4 (C13), 20.4 (py-CH<sub>3</sub>), 14.6 (Pd-Me).

Anal. Found (calcd for C<sub>56</sub>H<sub>45</sub>B<sub>2</sub>Br<sub>2</sub>F<sub>8</sub>IrN<sub>6</sub>OPd): C, 46.70 (46.39); H, 3.39 (3.13); N, 5.57 (5.80).

The proton and carbon signals of a coordinating solvent were each overlapped with the residual proton signals and the carbon signals of CD<sub>3</sub>CN, respectively.

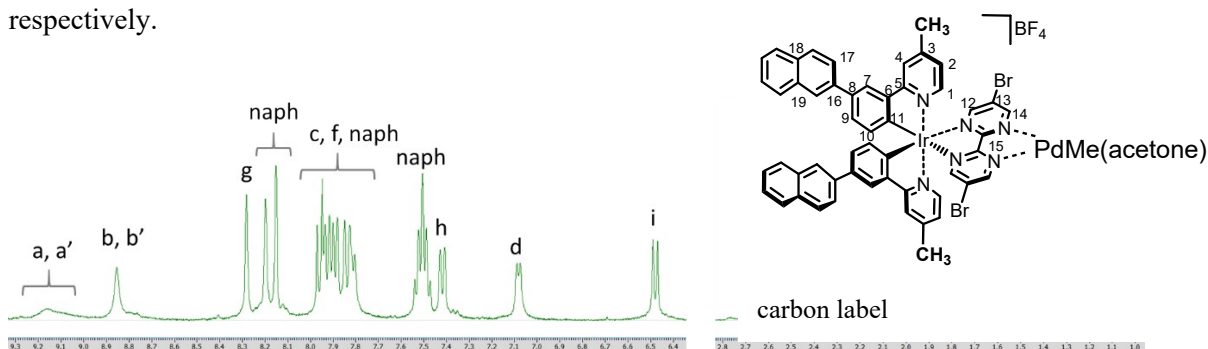

Figure S7. <sup>1</sup>H NMR spectra of **2-Me** (400 MHz, r.t., CD<sub>3</sub>NO<sub>2</sub>).

Preparation of [Ir(L1)<sub>2</sub>(bpm<sup>Br</sup>)Mn(CO)<sub>3</sub>Br](BF<sub>4</sub>) (**3-Me**).

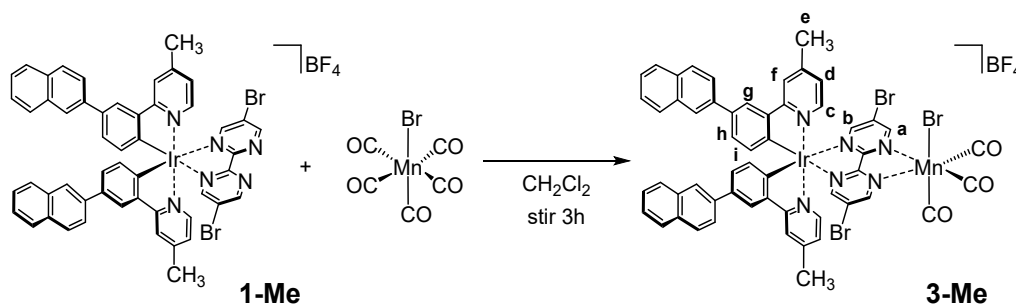

[Ir(L1)<sub>2</sub>(bpm<sup>Br</sup>)](BF<sub>4</sub>) (1.05 eq, 28.0 mg, 0.0236 mmol) and Mn(CO)<sub>5</sub>Br (1.0 eq, 6.20 mg, 0.0225 mmol) were dissolved in CH<sub>2</sub>Cl<sub>2</sub> (3 mL) and stirred at ambient temperature for 3 h. The solvent was removed under reduced pressure and the resulting solid was precipitated with CH<sub>2</sub>Cl<sub>2</sub>-hexane, which yielded [Ir(L1)<sub>2</sub>(bpm<sup>Br</sup>)Mn(CO)<sub>3</sub>Br](BF<sub>4</sub>) as a brownish-red solid (22.0 mg, 0.0157 mmol, 69.4%)

<sup>1</sup>H NMR (400 MHz, CD<sub>3</sub>CN, r.t.,  $\delta$  / ppm) : 8.23-8.17

S16

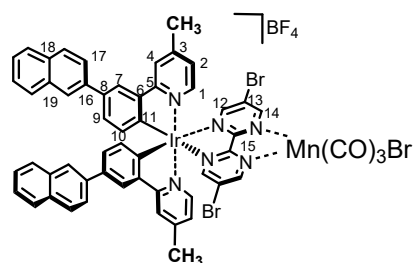

carbon label



## Electronic Supporting Information

(m, 8 H, a, g, *naphthyl*), 7.94 (m, 10 H, b, f, *naphthyl*), 7.67 (brs, 2 H, c), 7.52-7.45 (m, 4 H, *naphthyl*), 7.37 (d,  $J = 8.0$  Hz, 2 H, h), 6.99 (brs, 2 H, d), 6.38 (d,  $J = 8.0$  Hz, 2 H, i), 2.55 (s, 6 H, e).  $^{13}\text{C}$  NMR (100 MHz,  $\text{CD}_3\text{CN}$ , r.t.,  $\delta / \text{ppm}$ ) :  $\delta$  166.1 (C15), 151.8 (C1), 150.2 (C3), 147.4 (C6), 145.2 (C8), 138.1 (C16), 135.8 (C19), 133.9 (C18), 132.5 (C11), 132.4 (C10), 129.1 (*naphthyl*), 128.5 (*naphthyl*), 128.1 (*naphthyl*), 127.6 (*naphthyl*), 126.5 (C9), 126.0 (C7), 125.2 (C17), 124.9 (C2), 123.6 (C4), 121.4 (C13), 20.5 (py- $\text{CH}_3$ ). C14 and carbonyl carbon peaks were not observed due to broadening of the peaks by introducing Mn. ESI-MS ( $\text{CH}_3\text{CN}$ ) :  $m/z = 1211.2$  [(1-Me)Mn(CO) $_2$ ( $\text{CH}_3\text{CN}$ ) $_2$ ] $^+$ .

Anal. Found (calcd for  $\text{C}_{55}\text{H}_{36}\text{BBr}_3\text{F}_4\text{IrMnN}_6\text{O}_3$ ): C, 47.36 (47.10); H, 3.07 (2.59); N, 6.10 (5.99).

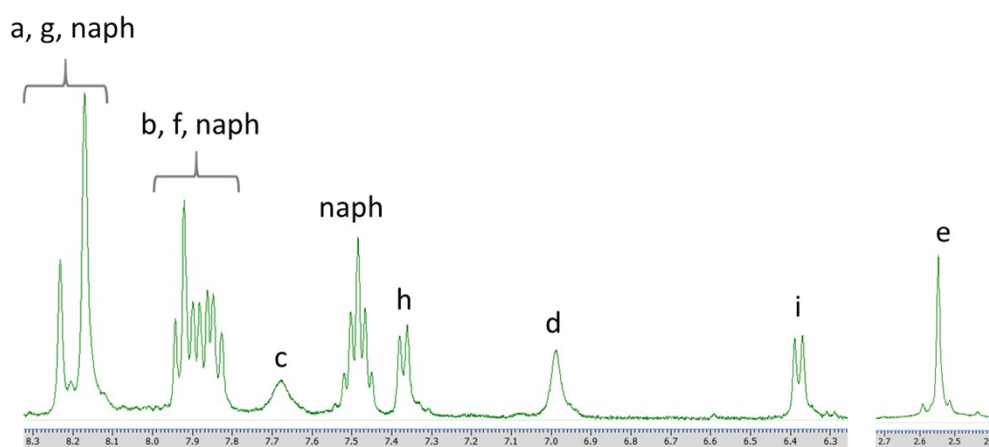

Figure S8.  $^1\text{H}$  NMR spectra of **3-Me** (400 MHz, r.t.,  $\text{CD}_3\text{CN}$ ).

Preparation of  $[\text{Ir}(\text{L1})_2(\text{bpm}^{\text{Br}})\text{Ir}(\text{cod})](\text{BF}_4)_2$ .

$[\text{Ir}(\text{L1})_2(\text{bpm}^{\text{Br}})](\text{BF}_4)$  (60.0 mg, 0.0507 mmol) was dissolved in acetone (3 mL) and acetone (3 mL) solution of  $[\text{Ir}(\text{cod})_2]\text{BF}_4$  (26.4 mg, 0.0532 mmol, 1.05 eq) was added. The mixture was stirred at ambient temperature for 3 h. The resulting solution was concentrated under vacuum and precipitated with acetone- $\text{Et}_2\text{O}$ . It gave the target compound  $[\text{Ir}(\text{L1})_2(\text{bpm}^{\text{Br}})\text{Ir}(\text{cod})](\text{BF}_4)_2$  as a brownish solid (62.0 mg, 0.0395 mmol, 77.9%).

$^1\text{H}$  NMR (400 MHz,  $\text{CDCl}_3$ , r.t.,  $\delta / \text{ppm}$ ) : 8.61 (s, 2 H, a), 8.40 (s, 2 H, b), 8.12 (d,  $J = 5.6$  Hz, 2 H, c), 8.03 (s, 2 H, g), 7.99 (s, 2 H, f), 7.91 – 7.85 (m, 8 H, *naphthyl*), 7.73 (d,  $J = 8.8$  Hz, 2 H, *naphthyl*), 7.51 – 7.45 (m, 4 H, *naphthyl*), 7.35 (d,  $J = 8.0$  Hz, 2 H, h), 7.27 (d,  $J = 5.6$  Hz, 2 H, d), 6.36 (d,  $J = 8.0$  Hz, 2 H, i), 4.94 (brs, 2 H, cod), 4.47 (brs, 2 H, cod), 2.66 – 2.58 (m, 8 H, e, cod), 2.51 – 2.41 (m, 2 H, cod), 2.12 – 2.04 (m, 2 H, cod), 1.96 – 1.89 (m, 2 H, cod).

## Electronic Supporting Information

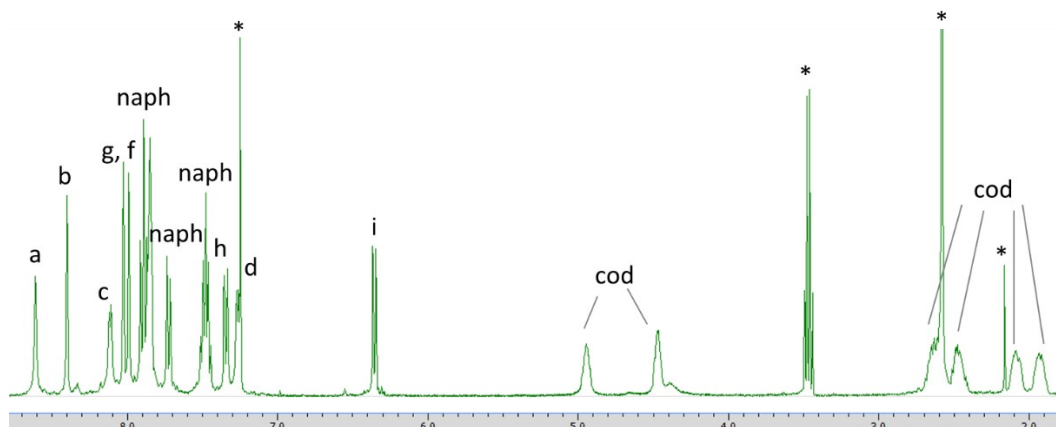

Figure S9.  $^1\text{H}$  NMR spectra of  $[\text{Ir}(\mathbf{L1})_2(\text{bpm}^{\text{Br}})\text{Ir}(\text{cod})](\text{BF}_4)_2$  (400 MHz, r.t.,  $\text{CDCl}_3$ ).

### Preparation of $[\text{Ir}(\mathbf{L1})_2(\text{bpm}^{\text{Br}})\text{Ir}(\text{PPh}_3)_2\text{H}_2](\text{BF}_4)_2$ (**4-Me**).

$[\text{Ir}(\mathbf{L1})_2(\text{bpm}^{\text{Br}})\text{Ir}(\text{cod})](\text{BF}_4)_2$  (62.0 mg, 0.0395 mmol) was dissolved in  $\text{CH}_2\text{Cl}_2$  (2.0 mL) and  $\text{H}_2$  gas was introduced (1 atm, 2 L balloon) after degassing by freeze-pump-thaw method. After stirring 30 minutes in  $\text{H}_2$  atmosphere,  $\text{CH}_2\text{Cl}_2$  (1 mL) solution of  $\text{PPh}_3$  (20.7 mg, 0.0790 mmol, 2 eq) was added and stirred overnight. The resulting solution was concentrated under vacuum and precipitated with  $\text{CH}_2\text{Cl}_2$  – hexane. The resulting solid was washed with  $\text{Et}_2\text{O}$  to remove free  $\text{PPh}_3$ . The target compound  $[\text{Ir}(\mathbf{L1})_2(\text{bpm}^{\text{Br}})\text{Ir}(\text{PPh}_3)_2(\text{H})_2](\text{BF}_4)_2$  as a dark-brown solid (49.9 mg, 0.0251 mmol, 63.6%).

$^1\text{H}$  NMR (400 MHz,  $\text{CDCl}_3$ , r.t.,  $\delta$  / ppm) : 8.35 (s, 2 H, a), 8.12 (s, 2 H, b), 8.05 (s, 2 H, naphthyl), 8.04 (s, 2 H, g), 7.98 (s, 2 H, f), 7.90 – 7.83 (m, 8 H, naphthyl), 7.74 (d,  $J = 8.0$  Hz, 2 H, h), 7.67 (d,  $J = 5.6$  Hz, 2 H, c), 7.51 – 7.44 (m, 4 H, naphthyl), 7.37 – 7.32 (m, 20 H, d,  $\text{PPh}_3$ ), 7.17 – 7.13 (m, 12 H,  $\text{PPh}_3$ ), 6.37 (d,  $J = 8.0$  Hz, 2 H, i), 2.65 (s, 6 H, e), -19.9 (t,  $J = 16$  Hz, 2 H, Ir-H).  $^{13}\text{C}$  NMR (100 MHz,  $\text{CD}_3\text{NO}_2$ , r.t.,  $\delta$  / ppm) :  $\delta$  166.5 (C15), 161.7 (C14), 161.1 (C5), 157.6 (C12), 153.4 (C1), 148.8 (C3), 144.7 (C6), 143.1 (C8), 137.8 (C16), 136.7 (C19), 133.9 (C18), 132.9-132.7 ( $\text{PPh}_3$ ), 132.1 (C11), 131.5 (C10), 130.5-130.0 ( $\text{PPh}_3$ ), 129.3 (naphthyl), 129.0-128.9 ( $\text{PPh}_3$ ), 128.6 (naphthyl), 128.1 (naphthyl), 127.6 (naphthyl), 127.5 (naphthyl), 126.6 (naphthyl), 126.1 (C9), 125.5 (C7), 124.9 (C17), 124.8 (C2), 123.6 (C4), 122.1 (C13), 20.3 (py- $\text{CH}_3$ ).  $^{31}\text{P}\{^1\text{H}\}$  NMR (162 MHz,  $\text{CDCl}_3$ , r.t.,  $\delta$ /ppm):  $\delta$  19.6 (s). Anal. Found (calcd for  $\text{C}_{88}\text{H}_{68}\text{B}_2\text{Br}_2\text{F}_8\text{Ir}_2\text{N}_6\text{P}_2 + \text{CH}_2\text{Cl}_2$ ) : C; 51.17 (51.53), H; 3.57 (3.40), N; 3.88 (4.05).

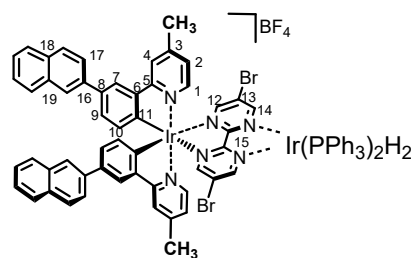

carbon label

## Electronic Supporting Information

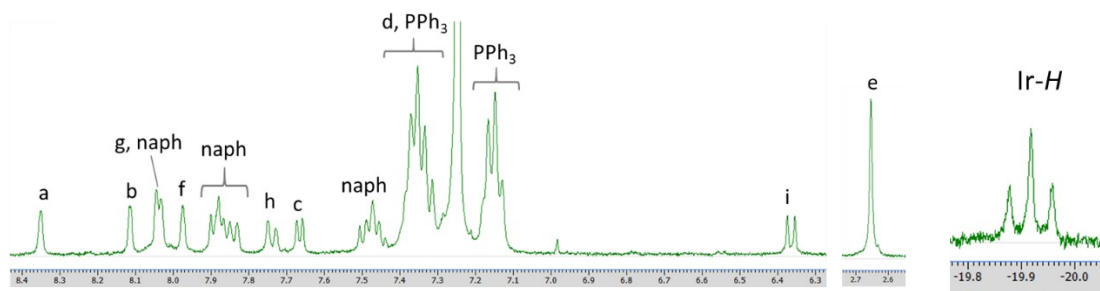

Figure S10.  $^1\text{H}$  NMR spectra of **4-Me** (400 MHz, r.t.,  $\text{CDCl}_3$ ).

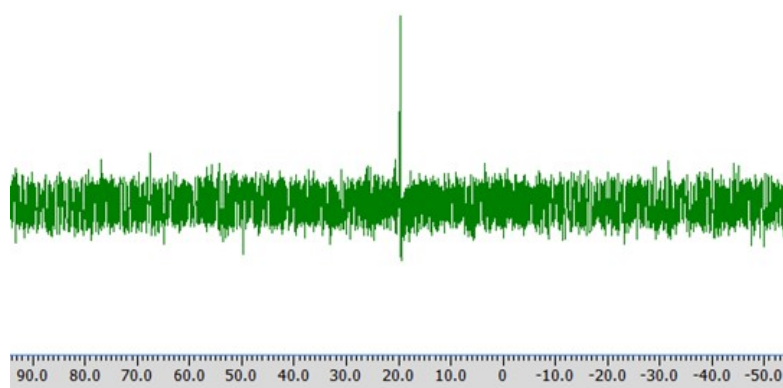

Figure S11.  $^{31}\text{P}\{^1\text{H}\}$  NMR spectra of **4-Me** (162 MHz, r.t.,  $\text{CDCl}_3$ ).

### Photochemical Catalytic Reaction.

A  $\text{CD}_3\text{NO}_2$  solution (0.4 mL) of styrene (0.5 mol/l) with a catalytic amount of the catalyst **1** (1 mol%) was prepared in a 5 $\phi$  NMR glass tube under nitrogen atmosphere. For visible-light irradiation, the tube was placed at a distance of 60 mm from a light source (150 W Xe lamp with a L42 cut-off filter ( $\lambda > 420$  nm) and a cold filter ( $\lambda < 730$  nm)). For the dark condition, the tube was foiled with an aluminum sheet and placed at the same position as the irradiation experiment. Reactions were followed by  $^1\text{H}$  NMR spectroscopy after appropriate time intervals.

For copolymerization of styrenes, a  $\text{CD}_3\text{NO}_2$  solution (0.4 mL) of both the substrates (50 equiv/cat, each) with a catalytic amount of the Ir-Pd complex (1 mol%) was prepared, then irradiated or kept dark, under the same condition.

## Electronic Supporting Information

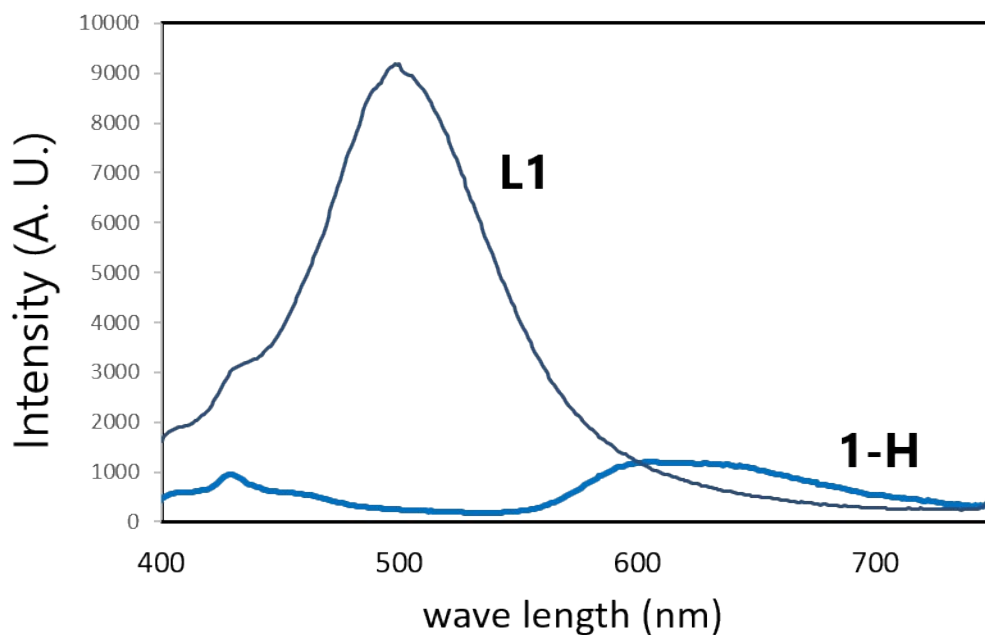

Figure S12. Emission spectra ( $\lambda_{\text{ex}} = 380 \text{ nm}$ , O.D. = 0.1) of **L1** and **1-H** measured in  $\text{CH}_3\text{CN}$  at ambient temperature.

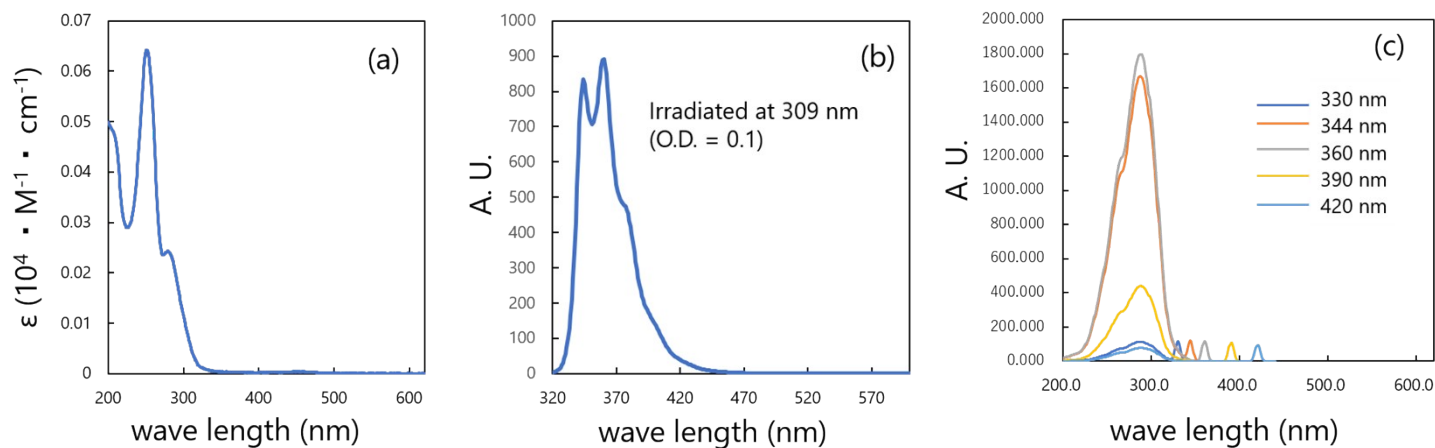

Figure S13. (a) Absorption spectrum, (b) emission spectrum (excitation at 309 nm, O.D. = 0.1), and (c) excitation spectra of **L1** measured in  $\text{CH}_3\text{CN}$  at r.t.

## Electronic Supporting Information

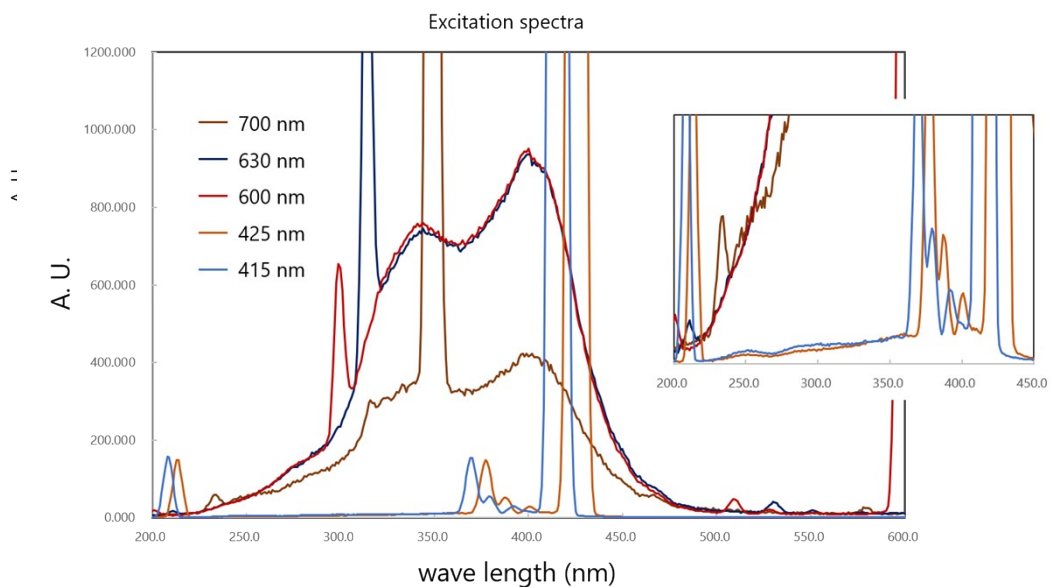

Figure S14. Excitation spectra of **1-Me** measured in CH<sub>3</sub>CN at r.t.

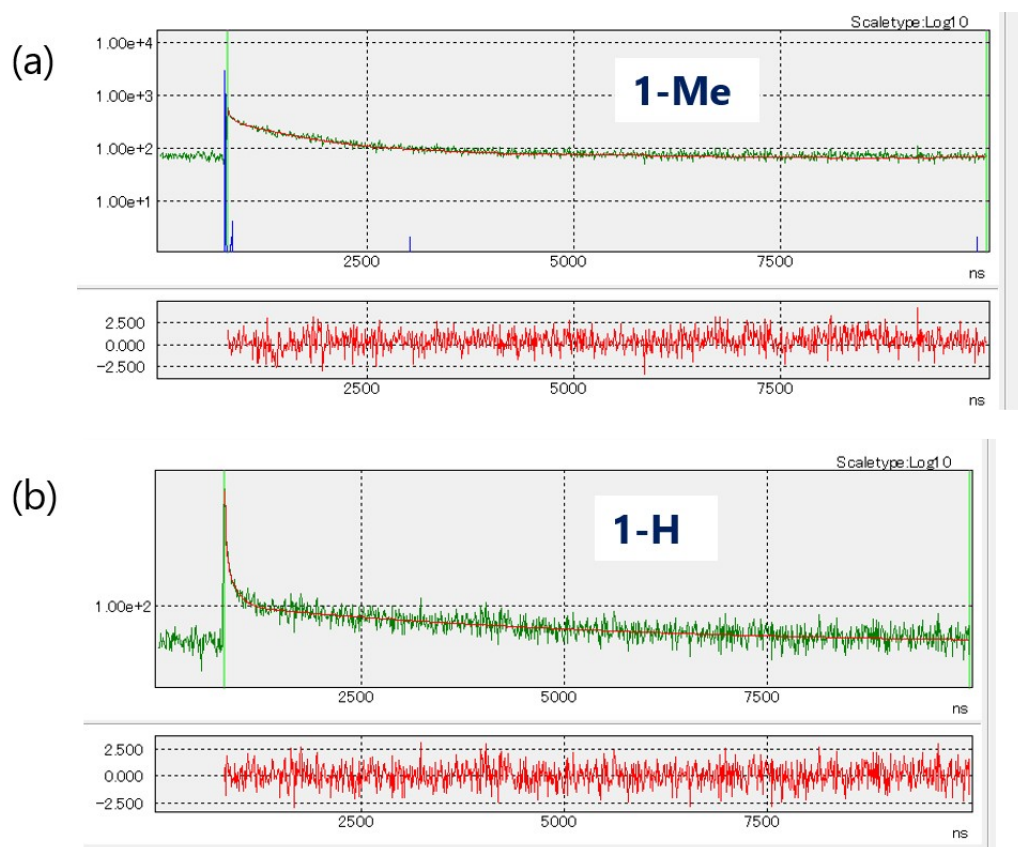

Figure S15. Emission decay curve vs time of (a) **1-Me** and (b) **1-H** measured in CH<sub>3</sub>CN at r.t. ( $\lambda_{\text{irr}} = 365 \text{ nm}$ ,  $\lambda_{\text{det}} = 640 \text{ nm}$ ).

## Electronic Supporting Information

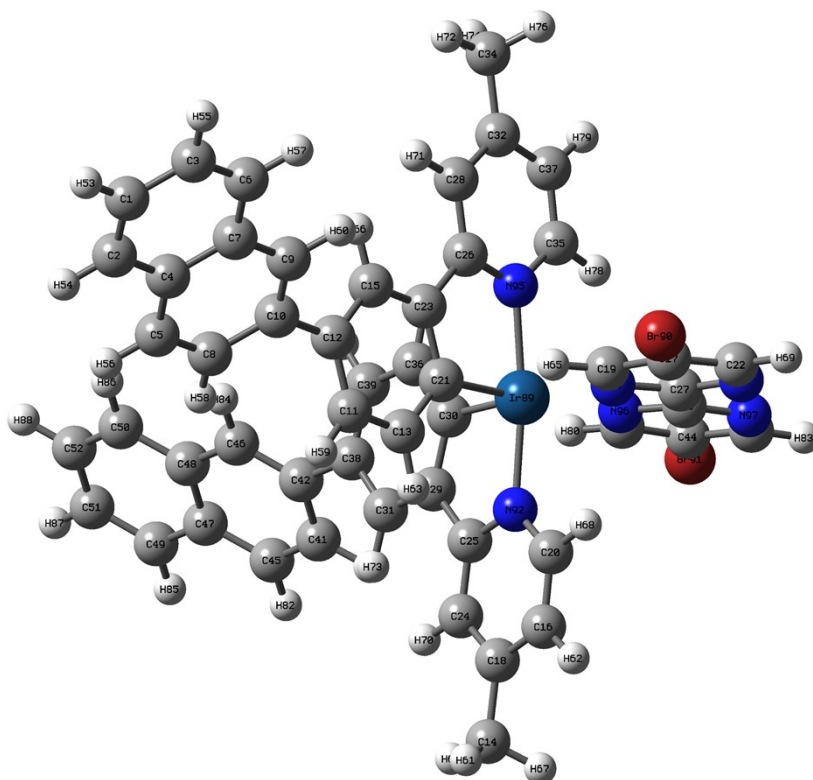

Figure S16. Optimized structure of **1-Me** cation.

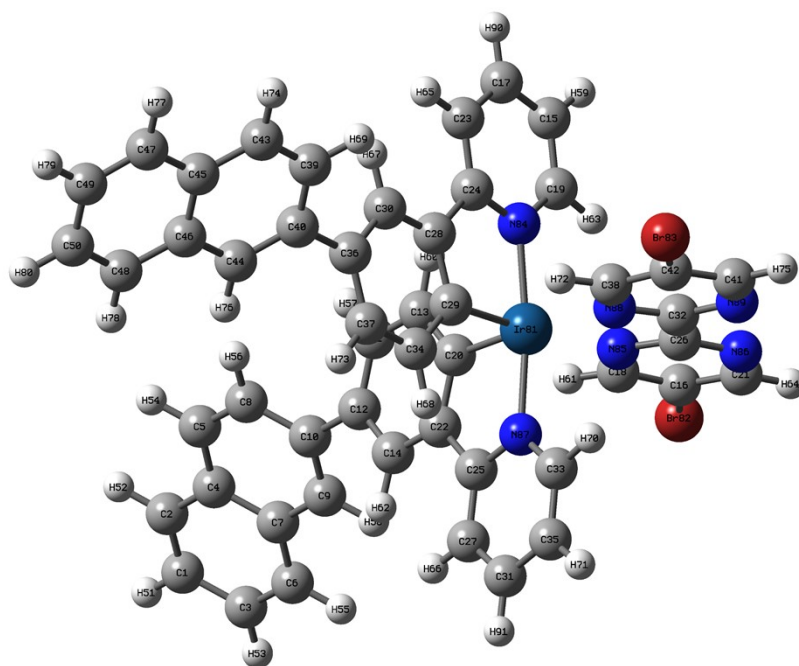

Figure S17. Optimized structure of **1-H** cation.

## Electronic Supporting Information

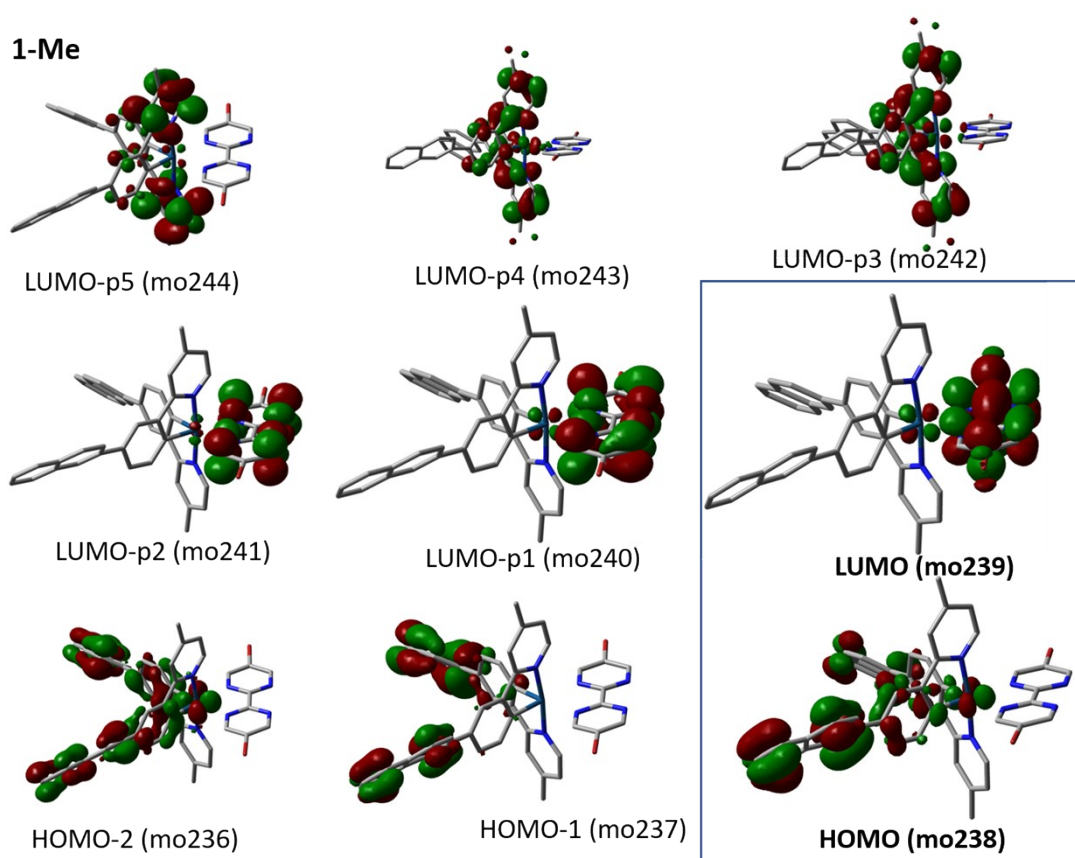

Figure S18. Frontier and energetically nearby orbitals of **1-Me**.



# Electronic Supporting Information

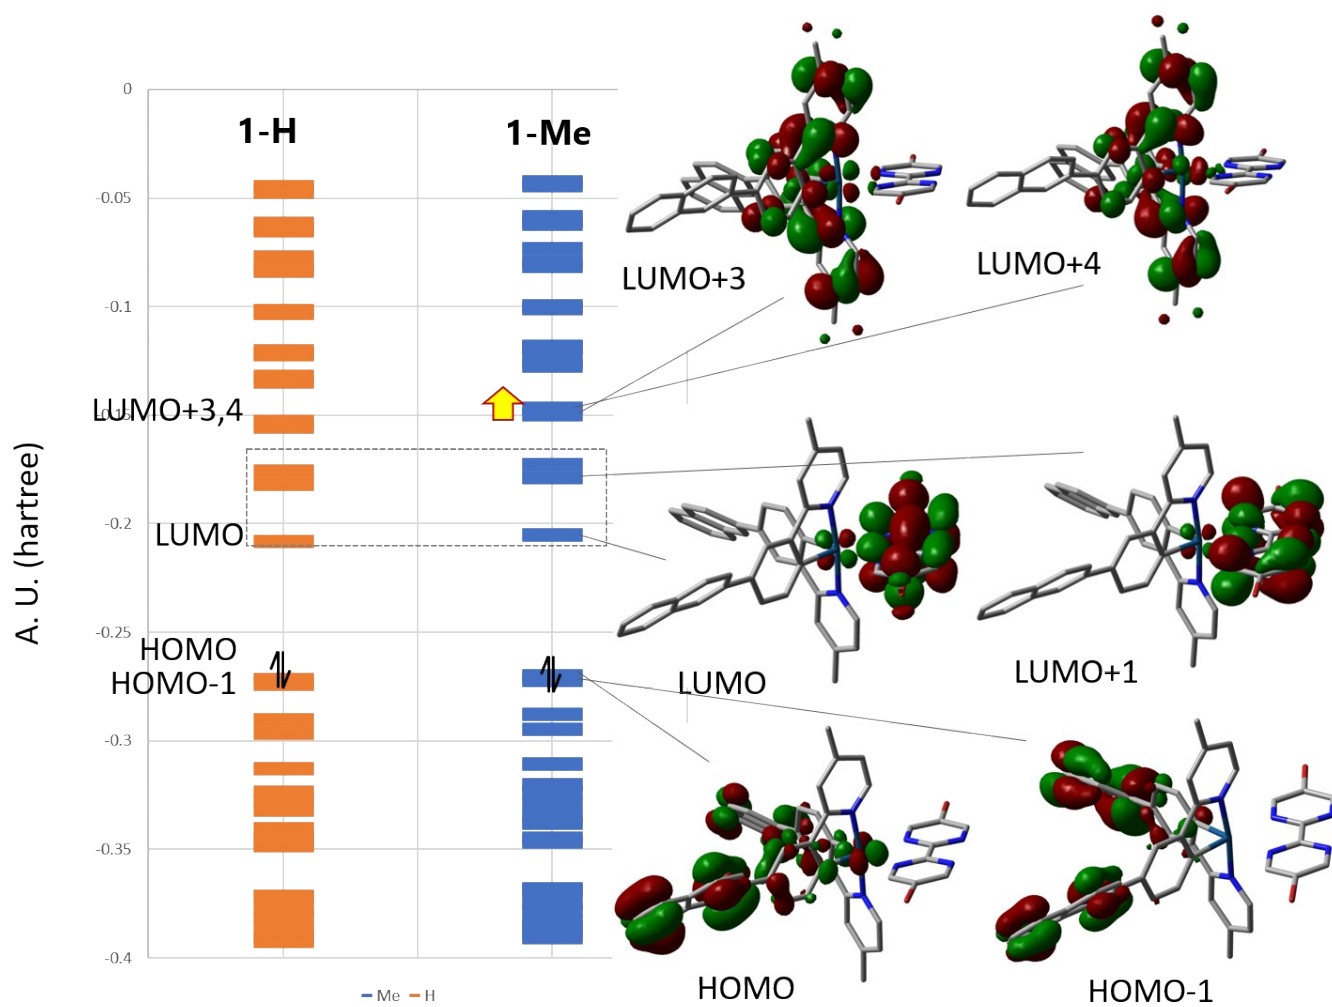

Figure S19. Selected MO energy of **1-Me** and **1-H**.



## Electronic Supporting Information

Table S3. XYZ coordinate of optimized structure of **1-Me**.

|   |              |              |              |
|---|--------------|--------------|--------------|
| 6 | 8.670777000  | 6.148056000  | 0.065113000  |
| 6 | 7.482205000  | 6.336954000  | 0.733322000  |
| 6 | 8.885391000  | 4.971386000  | -0.697348000 |
| 6 | 6.451723000  | 5.359710000  | 0.670518000  |
| 6 | 5.211349000  | 5.515249000  | 1.349525000  |
| 6 | 7.907686000  | 4.006451000  | -0.779377000 |
| 6 | 6.665573000  | 4.171582000  | -0.104498000 |
| 6 | 4.234514000  | 4.552413000  | 1.270799000  |
| 6 | 5.635895000  | 3.195444000  | -0.165652000 |
| 6 | 4.436265000  | 3.367568000  | 0.502130000  |
| 6 | 2.655394000  | 1.948449000  | 1.580546000  |
| 6 | 3.364218000  | 2.339561000  | 0.428959000  |
| 6 | 1.651007000  | 0.979740000  | 1.520271000  |
| 6 | -2.340738000 | -0.917335000 | 5.973328000  |
| 6 | 3.029247000  | 1.733787000  | -0.785688000 |
| 6 | -0.695212000 | -1.831462000 | 4.270183000  |
| 6 | 3.456409000  | -3.887663000 | 0.424235000  |
| 6 | -1.781204000 | -0.988612000 | 4.570182000  |
| 6 | 2.671562000  | -2.737757000 | 0.401215000  |
| 6 | -0.201359000 | -1.869313000 | 2.977475000  |
| 6 | 1.314023000  | 0.358376000  | 0.313949000  |
| 6 | 2.834317000  | -5.117851000 | 0.209956000  |
| 6 | 2.021455000  | 0.757503000  | -0.845586000 |
| 6 | -2.308550000 | -0.225163000 | 3.531360000  |
| 6 | -1.773445000 | -0.295718000 | 2.236924000  |
| 6 | 1.611029000  | 0.094504000  | -2.089285000 |
| 6 | 0.812731000  | -4.042900000 | -0.029029000 |
| 6 | 2.131868000  | 0.358492000  | -3.364398000 |
| 6 | -2.241703000 | 0.471846000  | 1.076521000  |
| 6 | -1.509807000 | 0.268042000  | -0.118134000 |
| 6 | -3.326618000 | 1.362241000  | 1.124972000  |
| 6 | 1.662910000  | -0.319313000 | -4.487212000 |
| 6 | -0.647530000 | -4.088448000 | -0.283587000 |
| 6 | 2.207686000  | -0.040278000 | -5.870103000 |
| 6 | 0.168498000  | -1.505193000 | -3.014506000 |

## Electronic Supporting Information

|   |              |              |              |
|---|--------------|--------------|--------------|
| 6 | -1.903986000 | 0.992810000  | -1.246815000 |
| 6 | 0.650822000  | -1.277093000 | -4.291930000 |
| 6 | -3.714239000 | 2.077116000  | -0.012543000 |
| 6 | -2.985151000 | 1.875888000  | -1.199619000 |
| 6 | -2.609308000 | -2.899717000 | -0.570118000 |
| 6 | -6.060691000 | 2.663813000  | 0.711388000  |
| 6 | -4.858404000 | 3.025909000  | 0.033983000  |
| 6 | -2.574827000 | -5.291246000 | -0.655512000 |
| 6 | -3.296936000 | -4.099907000 | -0.729848000 |
| 6 | -7.126403000 | 3.529191000  | 0.768077000  |
| 6 | -4.775519000 | 4.268281000  | -0.569596000 |
| 6 | -7.062911000 | 4.811302000  | 0.155279000  |
| 6 | -5.858841000 | 5.185457000  | -0.529152000 |
| 6 | -8.147022000 | 5.729948000  | 0.196395000  |
| 6 | -5.786090000 | 6.469603000  | -1.138603000 |
| 6 | -8.045184000 | 6.963062000  | -0.406798000 |
| 6 | -6.853365000 | 7.336181000  | -1.079511000 |
| 1 | 9.451181000  | 6.897682000  | 0.118867000  |
| 1 | 7.315222000  | 7.234667000  | 1.318709000  |
| 1 | 9.827583000  | 4.837603000  | -1.215539000 |
| 1 | 5.043530000  | 6.418305000  | 1.926544000  |
| 1 | 8.070600000  | 3.105298000  | -1.361147000 |
| 1 | 3.284506000  | 4.697697000  | 1.771714000  |
| 1 | 2.909242000  | 2.400098000  | 2.533209000  |
| 1 | 5.817345000  | 2.285776000  | -0.729245000 |
| 1 | -1.572090000 | -0.568368000 | 6.672886000  |
| 1 | -0.239750000 | -2.445969000 | 5.036153000  |
| 1 | 1.129391000  | 0.714459000  | 2.434472000  |
| 1 | -3.190935000 | -0.232800000 | 6.025735000  |
| 1 | 3.085524000  | -1.749345000 | 0.558986000  |
| 1 | 3.547364000  | 2.052392000  | -1.683034000 |
| 1 | -2.671172000 | -1.908366000 | 6.305257000  |
| 1 | 0.638971000  | -2.500237000 | 2.718975000  |
| 1 | 3.391699000  | -6.045387000 | 0.217890000  |
| 1 | -3.138817000 | 0.441089000  | 3.722241000  |
| 1 | 2.904004000  | 1.107986000  | -3.472835000 |

## Electronic Supporting Information

|    |              |              |              |
|----|--------------|--------------|--------------|
| 1  | 2.995869000  | 0.716029000  | -5.839443000 |
| 1  | -3.865137000 | 1.528309000  | 2.051114000  |
| 1  | 1.408812000  | 0.319105000  | -6.529306000 |
| 1  | -1.369148000 | 0.875705000  | -2.184101000 |
| 1  | 2.620417000  | -0.954927000 | -6.311317000 |
| 1  | -6.135402000 | 1.679080000  | 1.158611000  |
| 1  | -0.616183000 | -2.228445000 | -2.834786000 |
| 1  | 0.242917000  | -1.833373000 | -5.126160000 |
| 1  | -3.104011000 | -1.937193000 | -0.615207000 |
| 1  | -3.284774000 | 2.408336000  | -2.095464000 |
| 1  | -8.040828000 | 3.239273000  | 1.274637000  |
| 1  | -3.054009000 | -6.254352000 | -0.773288000 |
| 1  | -3.858182000 | 4.570362000  | -1.064179000 |
| 1  | -9.056375000 | 5.441962000  | 0.712811000  |
| 1  | -4.873456000 | 6.753177000  | -1.651845000 |
| 1  | -8.875856000 | 7.657719000  | -0.370214000 |
| 1  | -6.789468000 | 8.311361000  | -1.547476000 |
| 77 | -0.039772000 | -1.107981000 | 0.015387000  |
| 35 | 5.356588000  | -3.769230000 | 0.744937000  |
| 35 | -5.201743000 | -4.101942000 | -1.045064000 |
| 7  | -0.719686000 | -1.126292000 | 1.976324000  |
| 7  | 1.347688000  | -2.815779000 | 0.179586000  |
| 7  | 1.509155000  | -5.184947000 | -0.016820000 |
| 7  | 0.629827000  | -0.843831000 | -1.931516000 |
| 7  | -1.282567000 | -2.893601000 | -0.351787000 |
| 7  | -1.247668000 | -5.274820000 | -0.431151000 |

Table S4. XYZ coordinate of optimized structure of **1-H**.

|   |             |             |              |
|---|-------------|-------------|--------------|
| 6 | 8.623040000 | 6.193331000 | -0.247170000 |
| 6 | 7.453869000 | 6.379761000 | 0.455080000  |
| 6 | 8.823647000 | 5.011104000 | -1.004847000 |
| 6 | 6.429628000 | 5.394258000 | 0.432649000  |
| 6 | 5.209138000 | 5.547160000 | 1.147345000  |
| 6 | 7.851535000 | 4.038065000 | -1.048154000 |
| 6 | 6.629254000 | 4.200417000 | -0.337394000 |
| 6 | 4.237689000 | 4.576537000 | 1.107153000  |

## Electronic Supporting Information

|   |              |              |              |
|---|--------------|--------------|--------------|
| 6 | 5.605686000  | 3.216251000  | -0.358431000 |
| 6 | 4.425461000  | 3.386132000  | 0.343619000  |
| 6 | 2.686672000  | 1.965256000  | 1.486996000  |
| 6 | 3.359381000  | 2.349914000  | 0.311609000  |
| 6 | 1.687192000  | 0.989768000  | 1.465494000  |
| 6 | 2.993647000  | 1.730104000  | -0.886813000 |
| 6 | -0.555501000 | -1.822103000 | 4.303886000  |
| 6 | 3.487084000  | -3.882905000 | 0.364419000  |
| 6 | -1.633590000 | -0.983689000 | 4.610157000  |
| 6 | 2.696160000  | -2.736826000 | 0.353637000  |
| 6 | -0.099864000 | -1.863216000 | 2.994062000  |
| 6 | 1.319711000  | 0.354581000  | 0.275611000  |
| 6 | 2.864926000  | -5.117519000 | 0.176735000  |
| 6 | 1.990984000  | 0.746497000  | -0.907520000 |
| 6 | -2.207302000 | -0.224126000 | 3.599869000  |
| 6 | -1.708508000 | -0.300114000 | 2.289519000  |
| 6 | 1.549900000  | 0.069729000  | -2.131535000 |
| 6 | 0.832327000  | -4.053736000 | -0.015034000 |
| 6 | 2.033232000  | 0.322110000  | -3.425470000 |
| 6 | -2.213029000 | 0.455121000  | 1.137986000  |
| 6 | -1.514538000 | 0.245902000  | -0.075450000 |
| 6 | -3.301097000 | 1.340442000  | 1.211375000  |
| 6 | 1.524109000  | -0.379302000 | -4.509725000 |
| 6 | -0.634391000 | -4.108737000 | -0.228237000 |
| 6 | 0.083185000  | -1.551103000 | -2.996981000 |
| 6 | -1.944675000 | 0.959821000  | -1.197665000 |
| 6 | 0.526521000  | -1.337107000 | -4.294144000 |
| 6 | -3.725176000 | 2.044159000  | 0.080095000  |
| 6 | -3.029128000 | 1.837299000  | -1.125895000 |
| 6 | -2.610080000 | -2.933274000 | -0.471043000 |
| 6 | -6.052160000 | 2.624391000  | 0.868460000  |
| 6 | -4.872795000 | 2.987069000  | 0.152246000  |
| 6 | -2.564579000 | -5.325175000 | -0.535781000 |
| 6 | -3.295413000 | -4.138512000 | -0.601030000 |
| 6 | -7.120186000 | 3.484888000  | 0.949939000  |
| 6 | -4.814481000 | 4.224583000  | -0.464041000 |

## Electronic Supporting Information

|   |              |              |              |
|---|--------------|--------------|--------------|
| 6 | -7.081794000 | 4.762114000  | 0.324984000  |
| 6 | -5.900900000 | 5.136610000  | -0.398561000 |
| 6 | -8.168957000 | 5.675627000  | 0.391384000  |
| 6 | -5.853222000 | 6.415907000  | -1.020512000 |
| 6 | -8.091734000 | 6.904135000  | -0.224711000 |
| 6 | -6.922779000 | 7.277561000  | -0.936245000 |
| 1 | 9.398827000  | 6.949281000  | -0.224214000 |
| 1 | 7.297722000  | 7.281765000  | 1.036813000  |
| 1 | 9.750637000  | 4.879585000  | -1.550276000 |
| 1 | 5.051881000  | 6.454420000  | 1.720696000  |
| 1 | 8.003718000  | 3.132783000  | -1.626378000 |
| 1 | 3.302122000  | 4.719868000  | 1.635088000  |
| 1 | 2.964798000  | 2.428003000  | 2.427431000  |
| 1 | 5.777159000  | 2.302721000  | -0.918914000 |
| 1 | -0.075753000 | -2.427130000 | 5.060852000  |
| 1 | 1.194119000  | 0.731095000  | 2.397240000  |
| 1 | 3.109781000  | -1.745434000 | 0.492564000  |
| 1 | 3.483358000  | 2.043557000  | -1.801760000 |
| 1 | 0.736469000  | -2.488473000 | 2.711039000  |
| 1 | 3.426512000  | -6.042553000 | 0.176571000  |
| 1 | -3.035295000 | 0.436674000  | 3.813781000  |
| 1 | 2.798014000  | 1.072323000  | -3.567982000 |
| 1 | -3.813726000 | 1.511179000  | 2.151262000  |
| 1 | -1.436620000 | 0.839163000  | -2.149265000 |
| 1 | -6.108470000 | 1.643135000  | 1.325902000  |
| 1 | -0.692743000 | -2.273765000 | -2.781909000 |
| 1 | 0.098580000  | -1.902661000 | -5.110373000 |
| 1 | -3.111394000 | -1.973962000 | -0.511433000 |
| 1 | -3.357211000 | 2.361153000  | -2.016777000 |
| 1 | -8.017384000 | 3.194699000  | 1.486220000  |
| 1 | -3.041216000 | -6.291994000 | -0.631417000 |
| 1 | -3.914060000 | 4.527283000  | -0.988459000 |
| 1 | -9.060744000 | 5.387501000  | 0.937460000  |
| 1 | -4.958042000 | 6.699761000  | -1.563456000 |
| 1 | -8.924497000 | 7.594960000  | -0.168676000 |
| 1 | -6.878205000 | 8.249083000  | -1.413918000 |

## Electronic Supporting Information

|    |              |              |              |
|----|--------------|--------------|--------------|
| 77 | -0.033940000 | -1.121557000 | 0.028232000  |
| 35 | 5.394163000  | -3.753120000 | 0.632467000  |
| 35 | -5.207597000 | -4.153384000 | -0.863686000 |
| 7  | -0.655967000 | -1.128004000 | 2.008080000  |
| 7  | 1.367130000  | -2.822572000 | 0.168601000  |
| 7  | 1.534313000  | -5.192300000 | -0.012828000 |
| 7  | 0.576822000  | -0.872924000 | -1.939475000 |
| 7  | -1.277898000 | -2.918049000 | -0.289233000 |
| 7  | -1.231797000 | -5.299432000 | -0.348510000 |
| 1  | -2.013214000 | -0.924362000 | 5.622522000  |
| 1  | 1.891621000  | -0.184160000 | -5.509412000 |

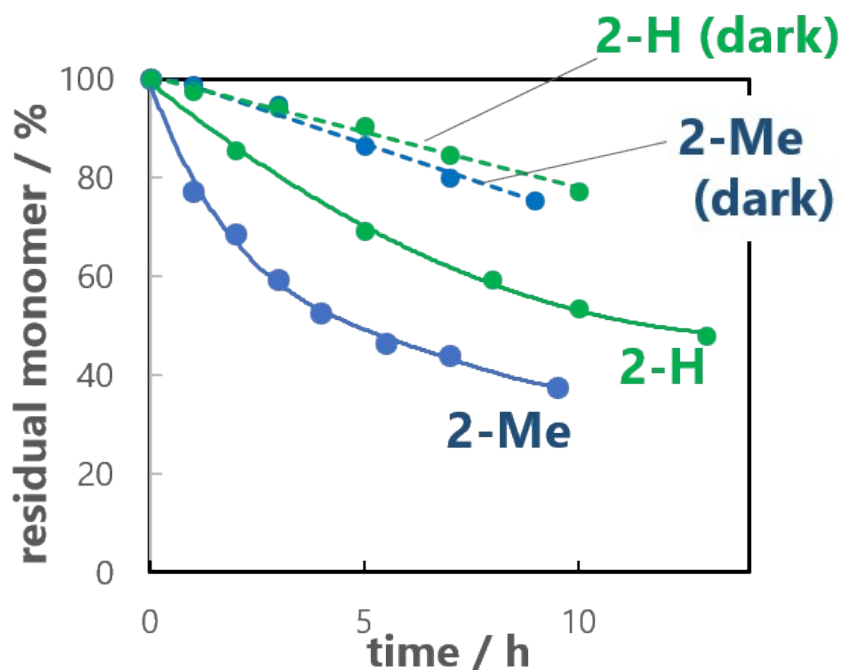

Figure S20. Residual monomer % in photocatalytic styrene polymerization by **2-Me** and **1-Me**. Catalyst 1 mol%,  $\text{CH}_3\text{NO}_2$  solution under irradiated (solid line) or dark (dotted line) condition. Polymers obtained under irradiated conditions.  $M_n = ca. 5000$ 、 $M_w / M_n = 1.4-1.5$ .

## Electronic Supporting Information

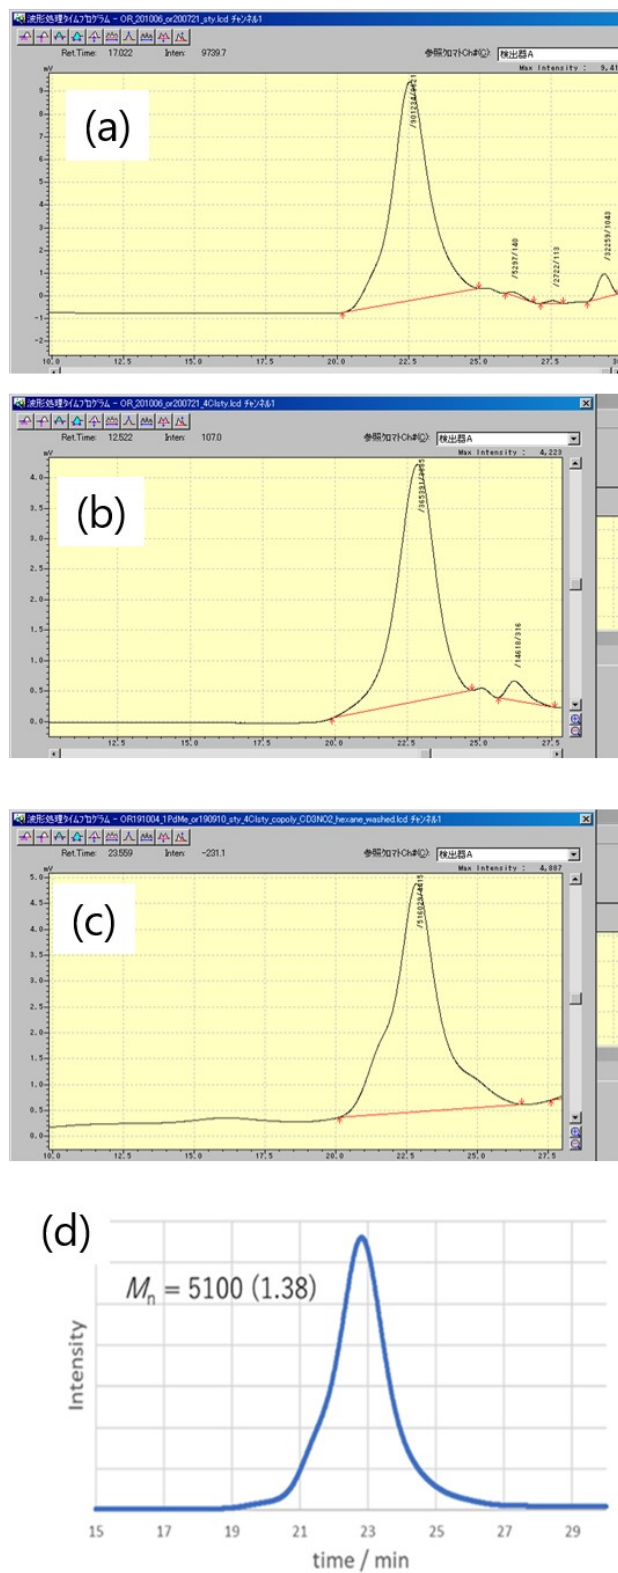

Figure S21. GPC traces of crude polymers catalyzed by **2-Me**. (a) polystyrene, (b) 4-chlorostyrene, (c) styrene-4-Cl-styrene copolymer, and (d) 4-Cl-styrene/styrene copolymer after hexane and  $\text{CH}_2\text{Cl}_2$  wash.

## Electronic Supporting Information

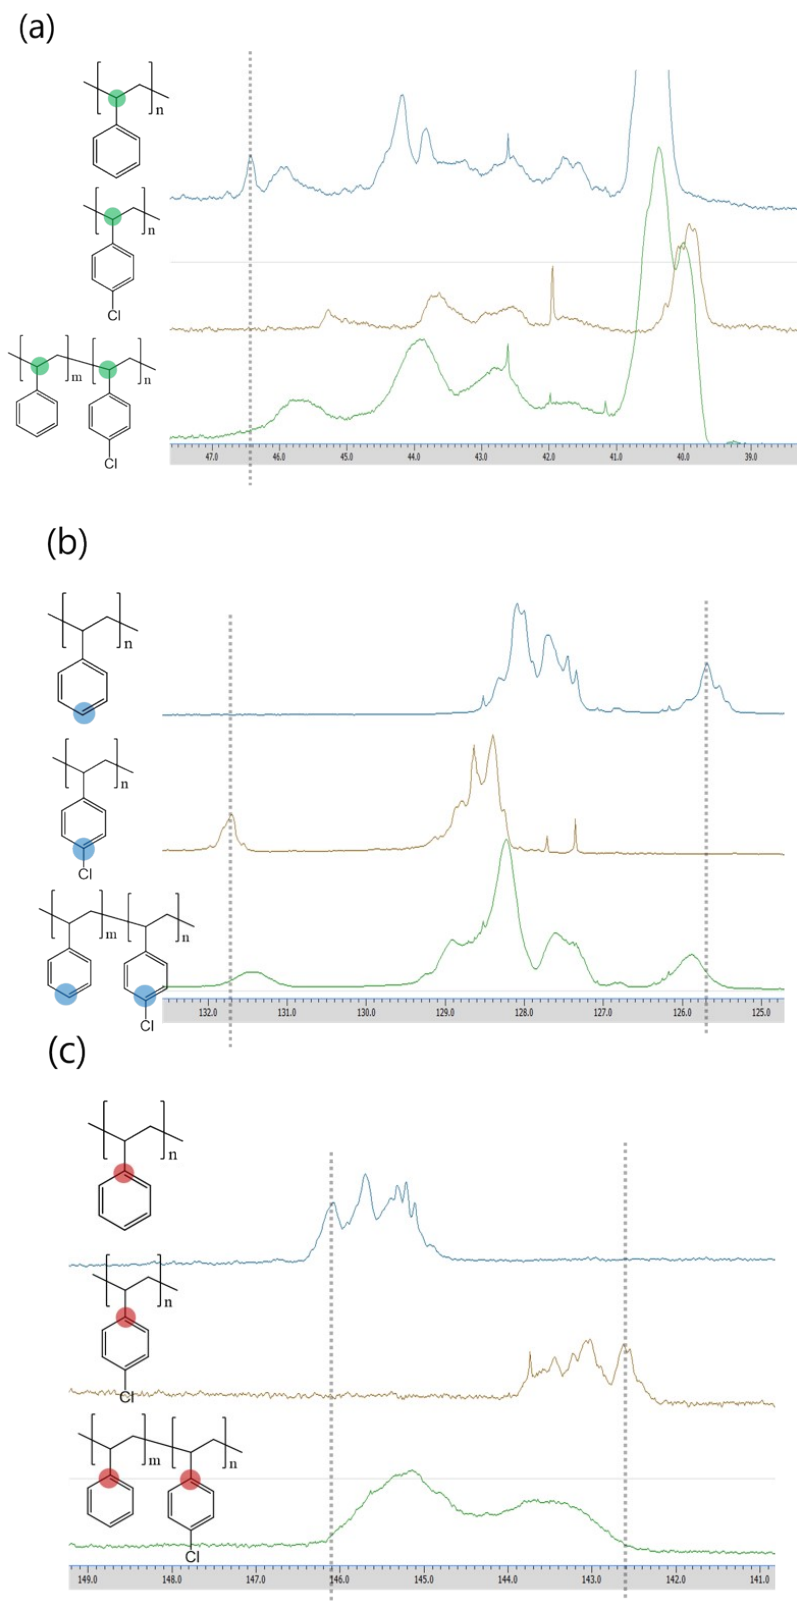

Figure S22. Selected  $^{13}\text{C}$  NMR spectral data of polystyrene (blue), poly-*p*-Cl-styrene (brown), and polystyrene-*co*-poly-*p*-Cl-styrene (green). (a) Methine carbon region, (b) aromatic carbon region (*p*-), and (c) aromatic *ipso*-carbon region.



## Electronic Supporting Information

### References

1. Peng, X.; Wu, Q.; Jiang, S.; Hanif, M.; Chen, S.; Hou, H., High dielectric constant polyimide derived from 5,5'-bis[(4-amino) phenoxy]-2,2'-bipyrimidine. *Journal of Applied Polymer Science* **2014**, *131* (24).
  2. Rulke, R. E.; Ernsting, J. M.; Spek, A. L.; Elsevier, C. J.; van Leeuwen, P. W. N. M.; Vrieze, K., NMR study on the coordination behavior of dissymmetric terdentate trinitrogen ligands on methylpalladium(II) compounds. *Inorganic Chemistry* **1993**, *32* (25), 5769-5778.
  3. Liu, S.-J.; Zhao, Q.; Fan, Q.-L.; Huang, W., A Series of Red-Light-Emitting Ionic Iridium Complexes: Structures, Excited State Properties, and Application in Electroluminescent Devices. *European Journal of Inorganic Chemistry* **2008**, *2008* (13), 2177-2185.
  4. Inagaki, A.; Edure, S.; Yatsuda, S.; Akita, M., Highly selective photo-catalytic dimerization of  $\alpha$ -methylstyrene by a novel palladium complex with photosensitizing ruthenium(ii) polypyridyl moiety. *Chemical Communications* **2005**, (43), 5468-5470.
- 
- (i) Frisch, M. J.; Trucks, G. W.; Schlegel, H. B.; Scuseria, G. E.; Robb, M. A.; Cheeseman, J. R.; Scalmani, G.; Barone, V.; Petersson, G. A.; Nakatsuji, H.; Li, X.; Caricato, M.; Marenich, A. V.; Bloino, J.; Janesko, B. G.; Gomperts, R.; Mennucci, B.; Hratchian, H. P.; Ortiz, J. V.; Izmaylov, A. F.; Sonnenberg, J. L.; Williams-Young, D.; Ding, F.; Lipparini, F.; Egidi, F.; Goings, J.; Peng, B.; Petrone, A.; Henderson, T.; Ranasinghe, D.; Zakrzewski, V. G.; Gao, J.; Rega, N.; Zheng, G.; Liang, W.; Hada, M.; Ehara, M.; Toyota, K.; Fukuda, R.; Hasegawa, J.; Ishida, M.; Nakajima, T.; Honda, Y.; Kitao, O.; Nakai, H.; Vreven, T.; Throssell, K.; Montgomery, J. A., Jr.; Peralta, J. E.; Ogliaro, F.; Bearpark, M. J.; Heyd, J. J.; Brothers, E. N.; Kudin, K. N.; Staroverov, V. N.; Keith, T. A.; Kobayashi, R.; Normand, J.; Raghavachari, K.; Rendell, A. P.; Burant, J. C.; Iyengar, S. S.; Tomasi, J.; Cossi, M.; Millam, J. M.; Klene, M.; Adamo, C.; Cammi, R.; Ochterski, J. W.; Martin, R. L.; Morokuma, K.; Farkas, O.; Foresman, J. B.; Fox, D. J. Gaussian 16, Revision A.03, Gaussian, Inc., Wallingford, CT, 2016.
- (ii) (a) Becke, A. D. Density-Functional Exchange-Energy Approximation with Correct Asymptotic Behavior. *Phys. Rev. A* **1988**, *38*, 3098–3100; (b) Becke, A. D. Density-Functional Thermochemistry. III. The Role of Exact Exchange. *J. Chem. Phys.* **1993**, *98*, 5648–5652; (c) Lee, C.; Yang, W.; Parr, R. G. Development of the Colle-Salvetti Correlation-Energy Formula into a Functional of the Electron Density. *Phys. Rev. B* **1988**, *37*, 785–789.
- (iii) (a) Dunning, T. H., Jr.; Hay, P. J. In *Modern Theoretical Chemistry*; Schaefer, H. F., III, Ed.; Plenum: New York, 1976; Vol. 3, pp 1–28; (b) Hay, P. J.; Wadt, W. R. *Ab Initio* Effective Core Potentials for Molecular Calculations. Potentials for the Transition Metal Atoms Sc to Hg. *J. Chem. Phys.* **1985**, *82*, 270–283; (c) Hay, P. J.; Wadt, W. R. *Ab Initio* Effective Core Potentials for Molecular Calculations. Potentials for K to Au Including the Outermost Core Orbitals. *J. Chem. Phys.* **1985**, *82*, 299–310; (d) Wadt, W. R.; Hay, P. J. *Ab Initio* Effective Core Potentials for Molecular Calculations. Potentials for Main Group Elements Na to Bi. *J. Chem. Phys.* **1985**, *82*, 284–298.
- (iv) Petersson, G. A.; Bennett, A.; Tensfeldt, T. G.; Al-Laham, M. A.; Shirley, W. A.; Mantzaris, J. A Complete Basis Set Model Chemistry. I. The Total Energies of Closed-Shell Atoms and Hydrides of the First-Row Elements. *J. Chem. Phys.* **1988**, *89*, 2193–2218.
- (v) Binkley, J. S.; Pople, J. A.; Hehre, W. J. Self-Consistent Molecular Orbital Methods. 21. Small Split-Valence Basis Sets for First-Row Elements. *J. Am. Chem. Soc.* **1980**, *102*, 939–947.
